# Supplementary material for: Rapid entry to functionally rich bicyclo[4.1.0]heptenone systems
Source: Royal Society of Chemistry journal article supplement (doi:10.1039/c3ra42282h), 2013-01-01
Supplement: c3ra42282h.pdf [file c3ra42282h.pdf]

## **Supporting Information**

**for**

### **Rapid Entry to Functionally Rich Bicyclo[4.1.0]heptenone Systems.**

Santhosh Kumar Chittimalla,\* and Chennakesavulu Bandi.

AMRI Singapore Research Centre, 61 Science Park Road, #05-01, Science Park III, Singapore 117525, Singapore.

Fax: +65 - 6398 5511.

E-mail: [santhosh.chittimalla@amriglobal.com](mailto:santhosh.chittimalla@amriglobal.com).

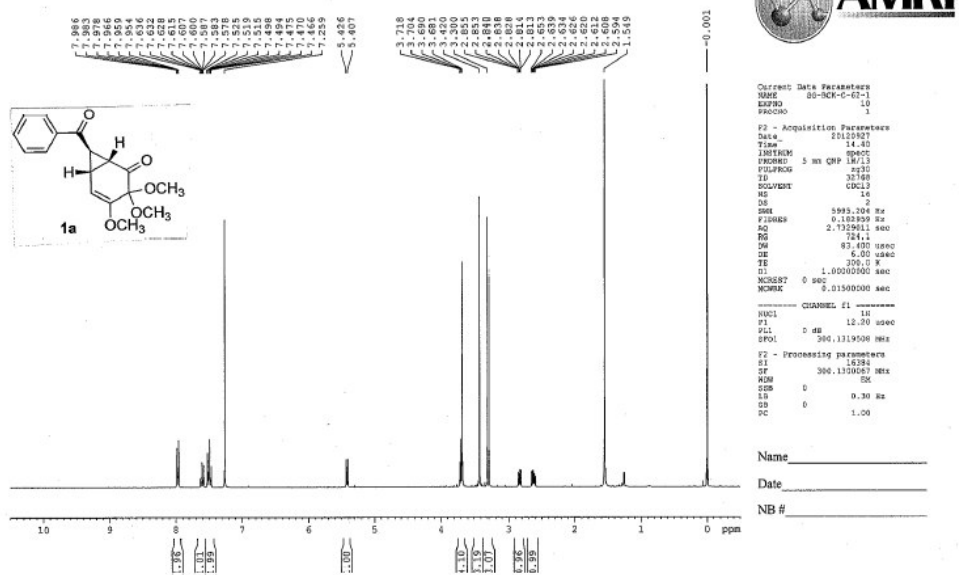

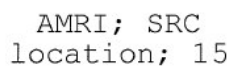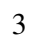

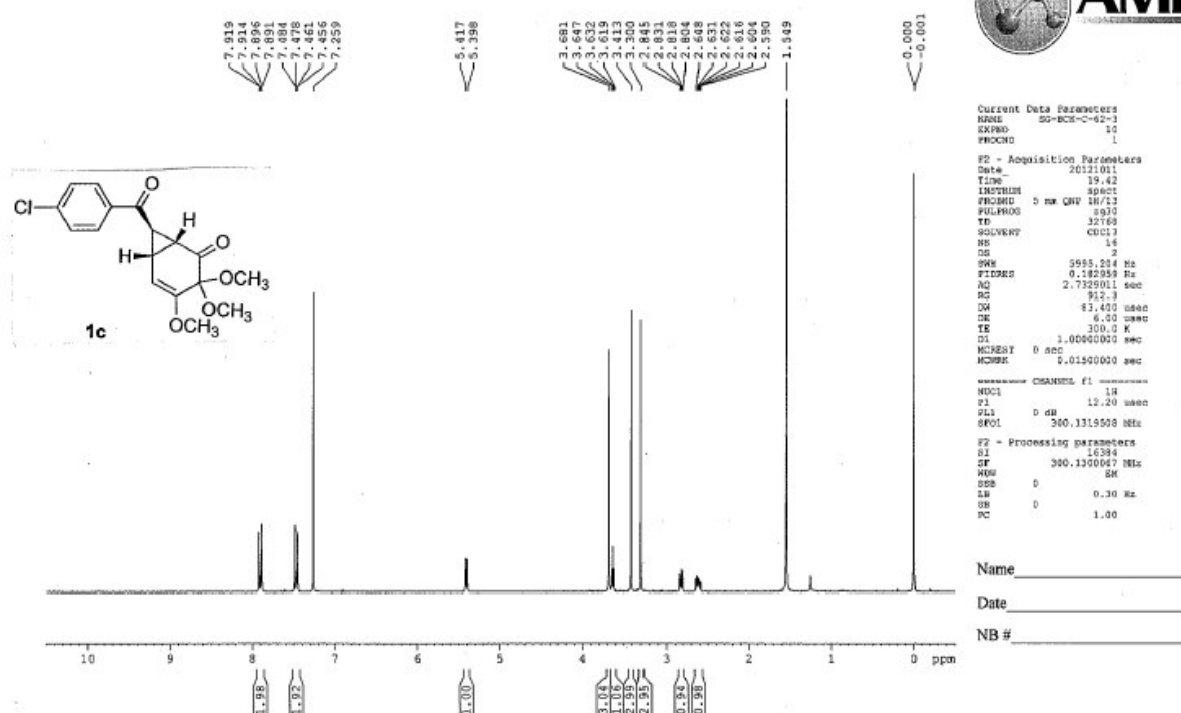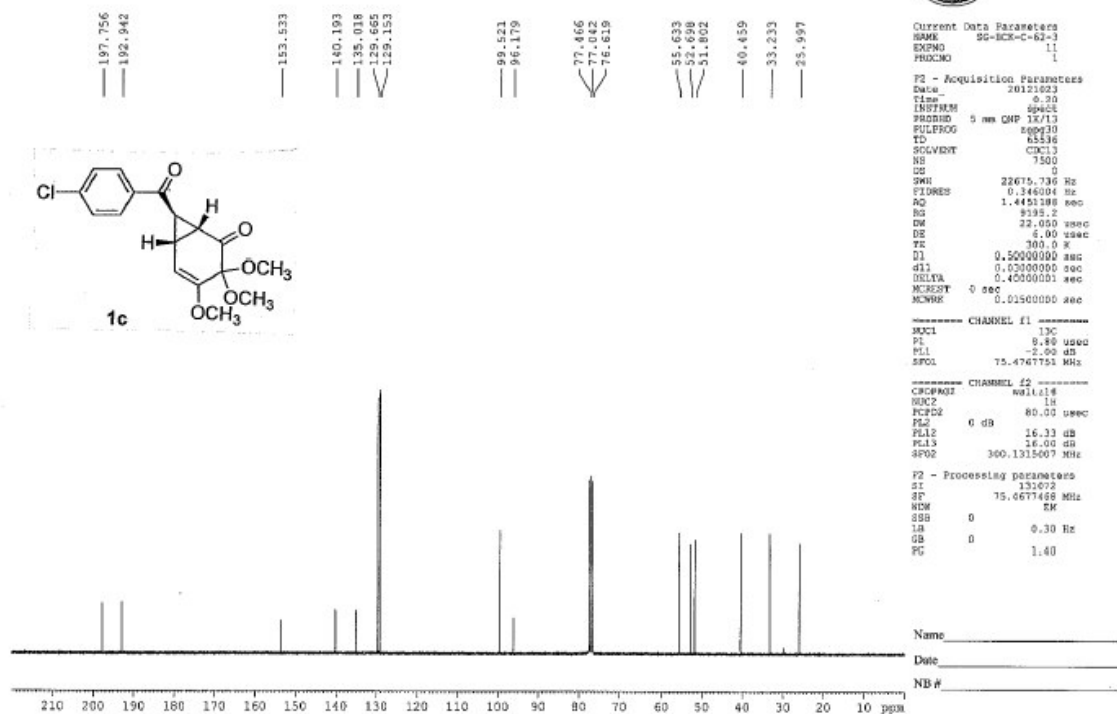

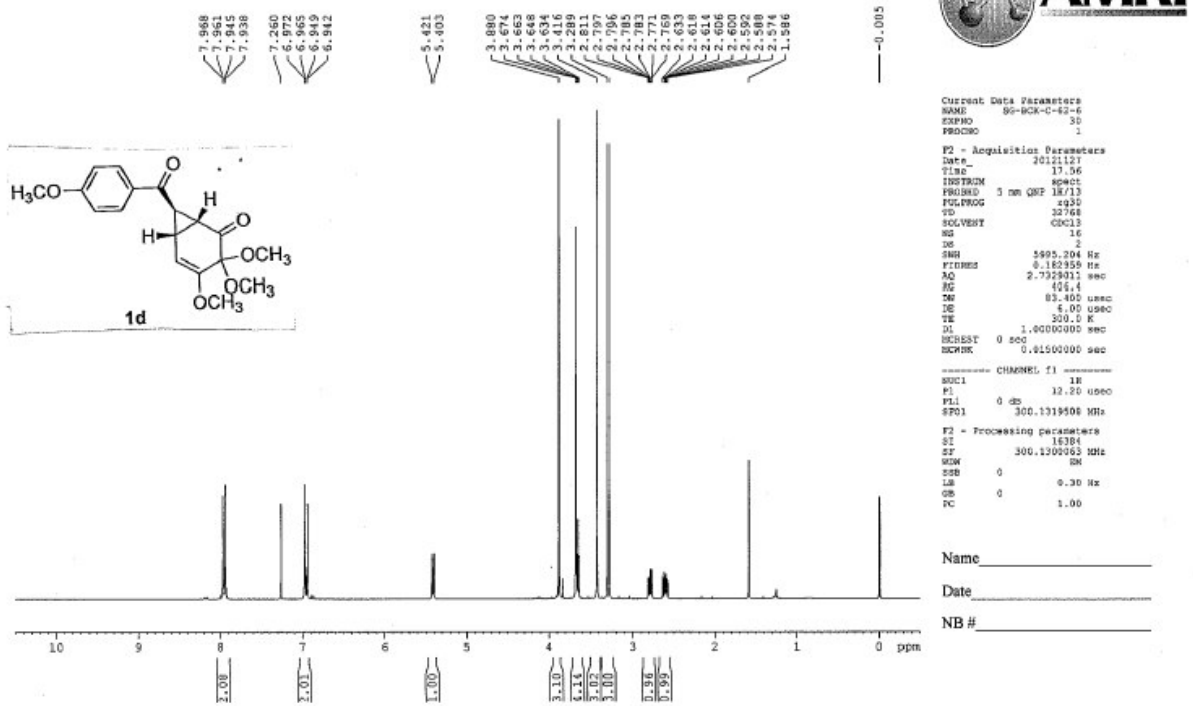

AMRI; SRC  
location; 15

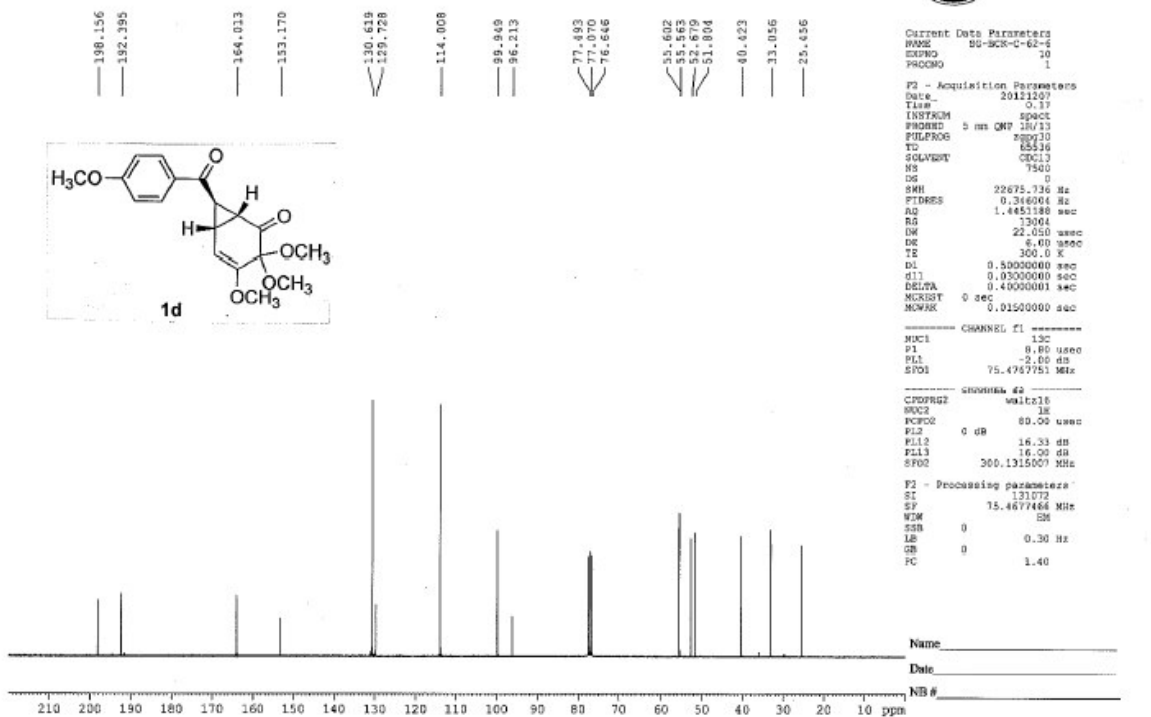

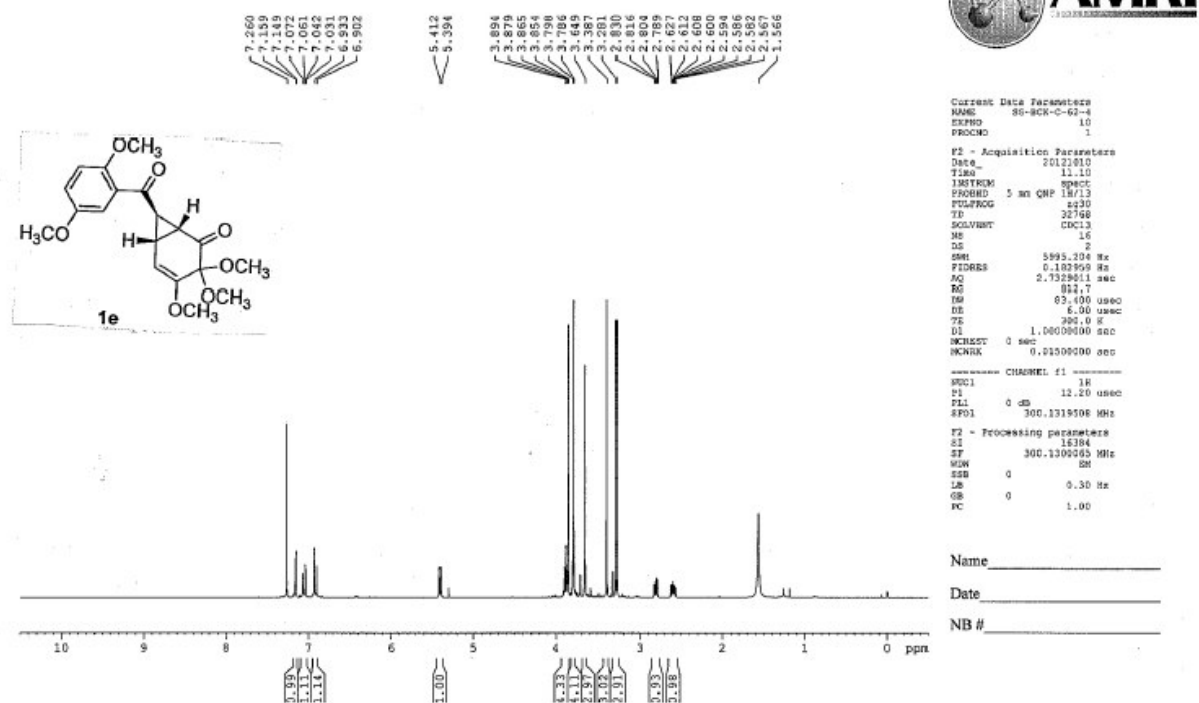

AMRI; SRC  
location; 15

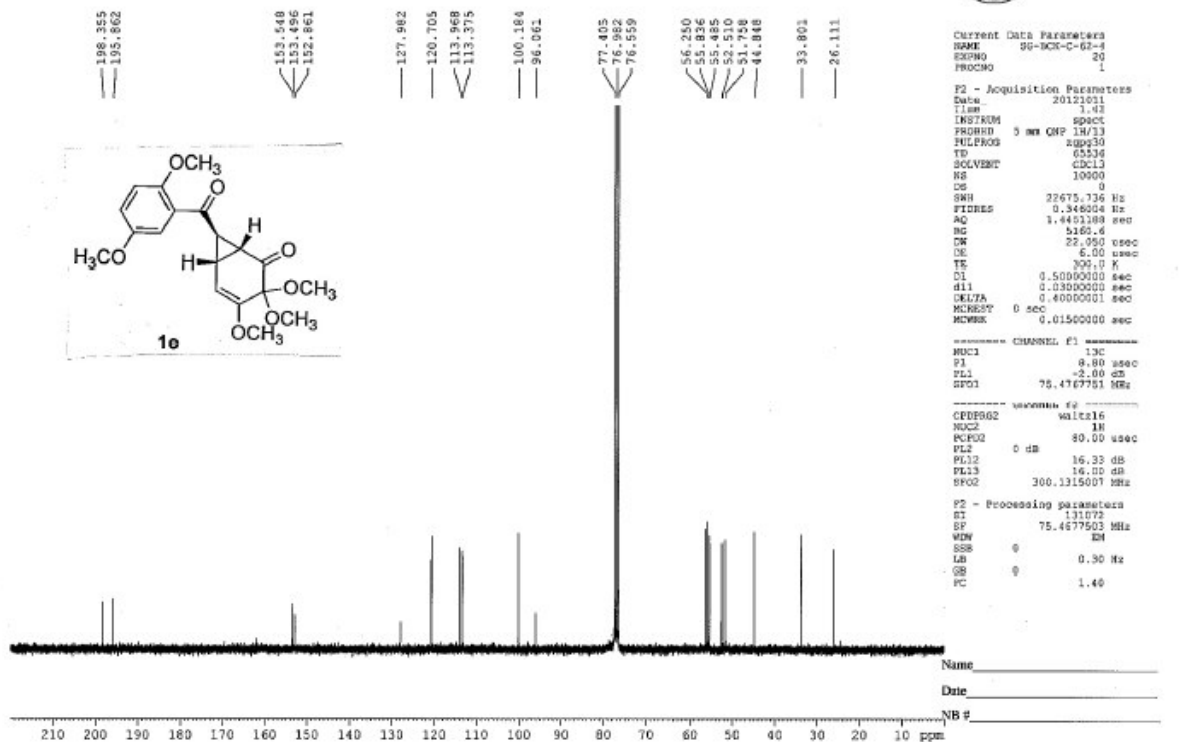

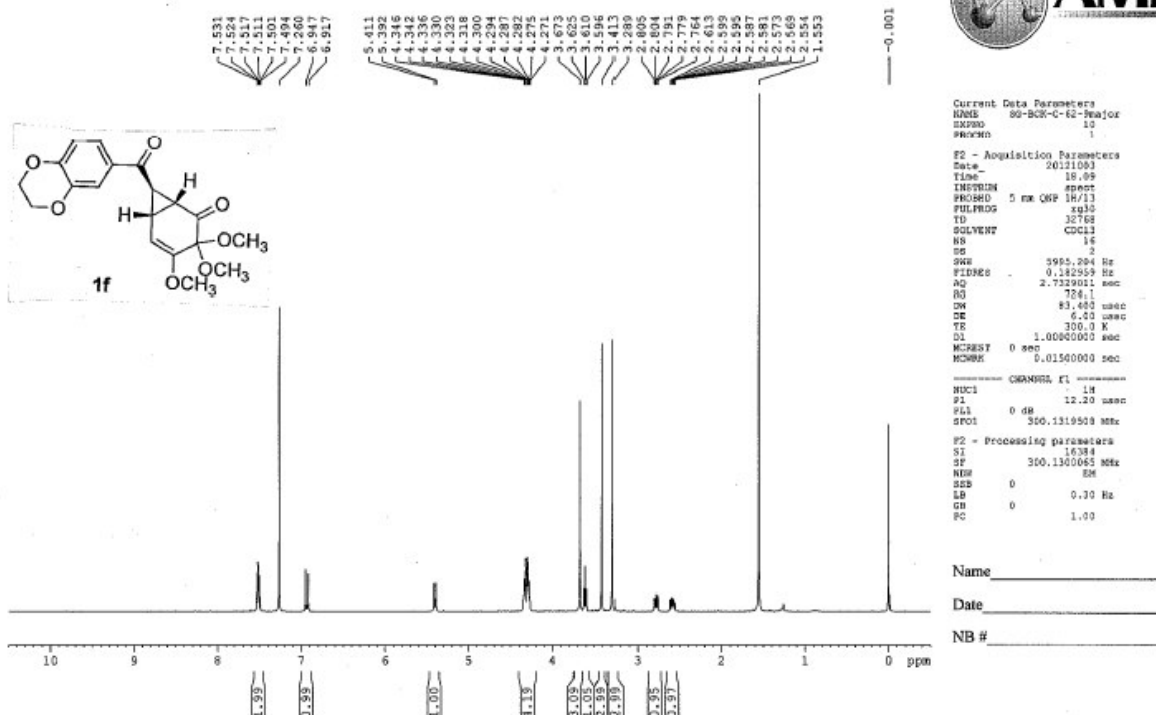

AMRI; SRC  
location; 15

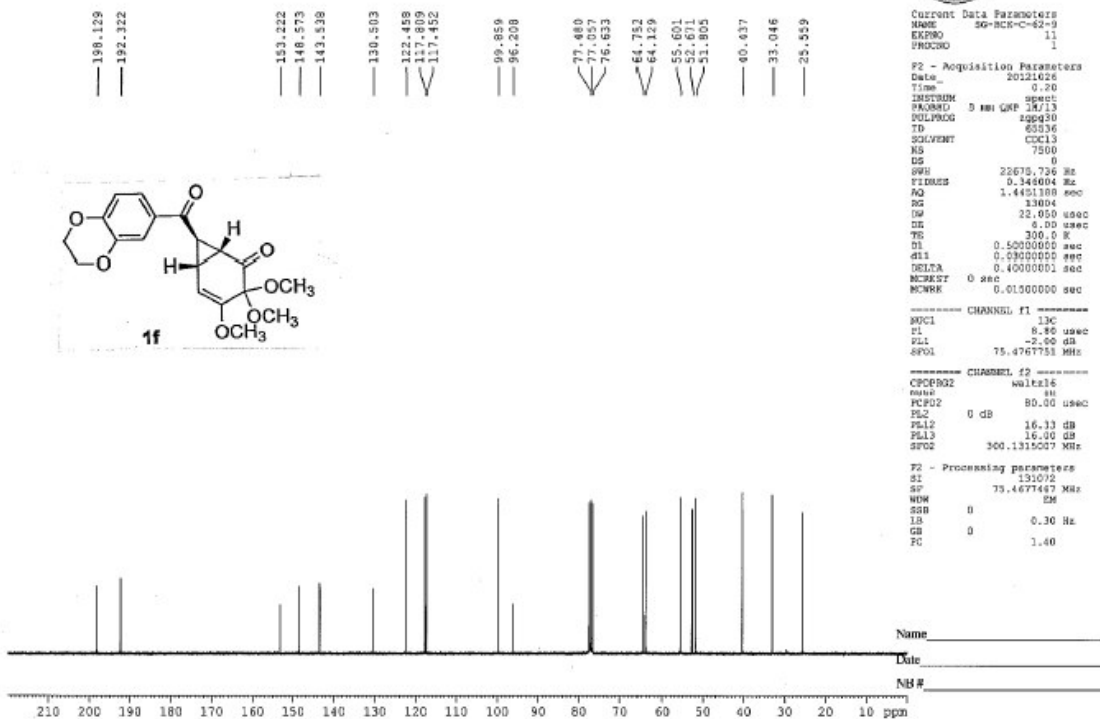



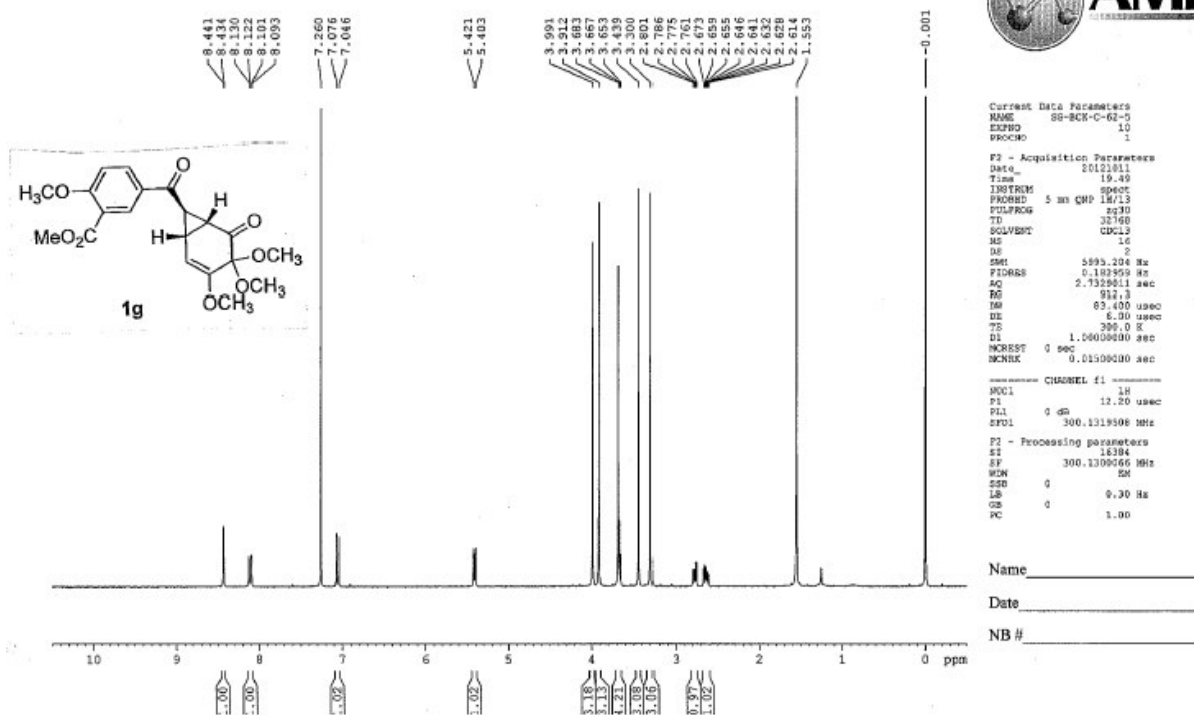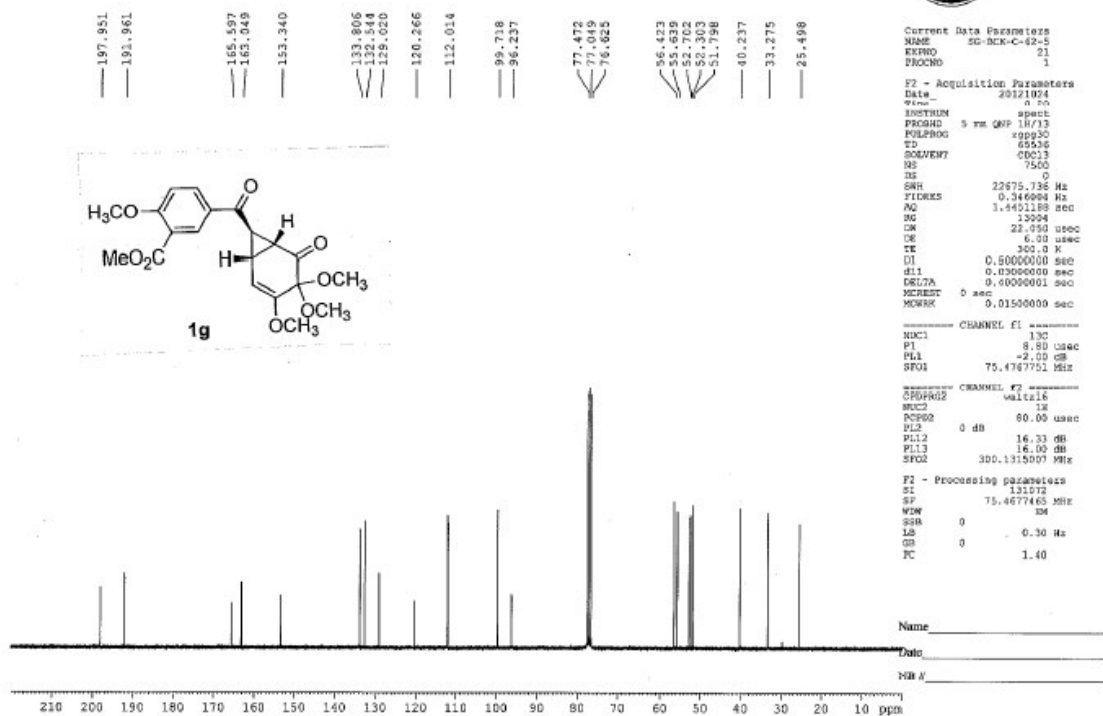



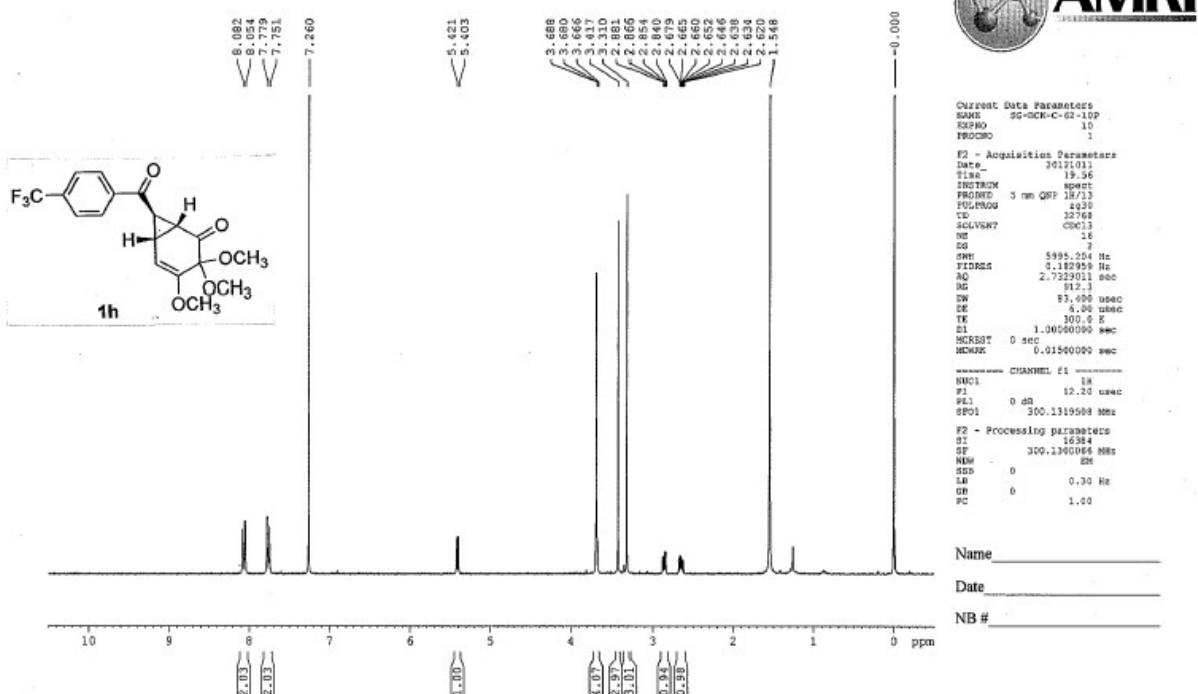

AMRI; SRC AV400  
location; 18

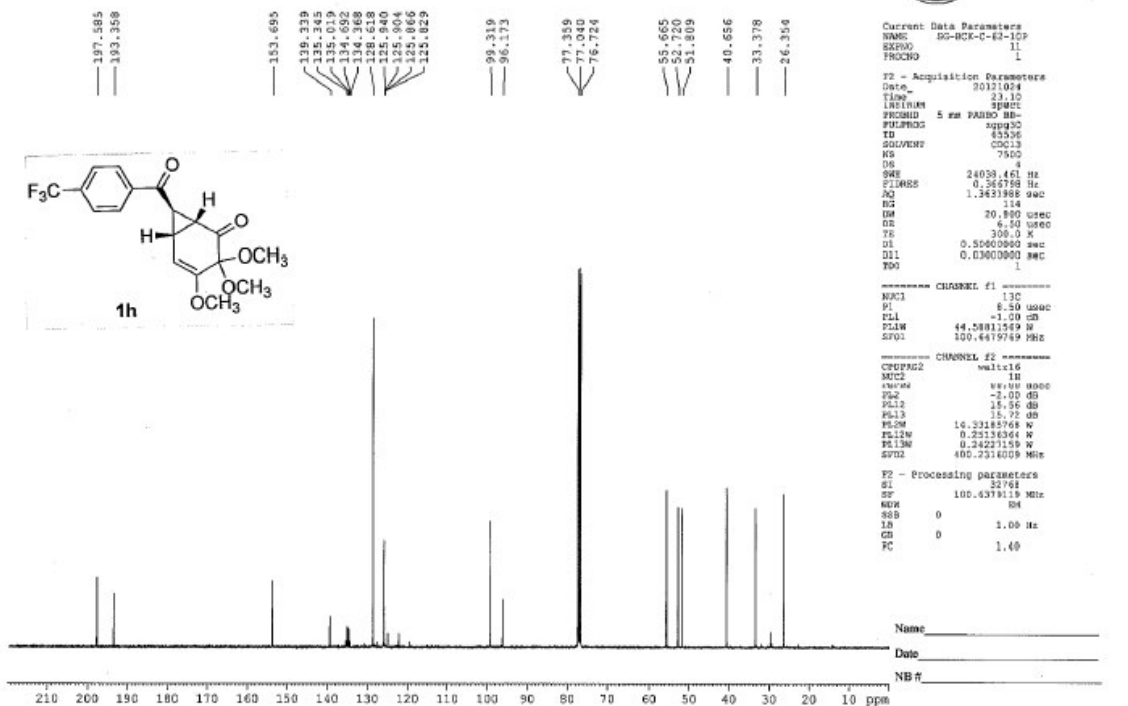

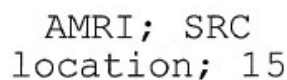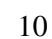

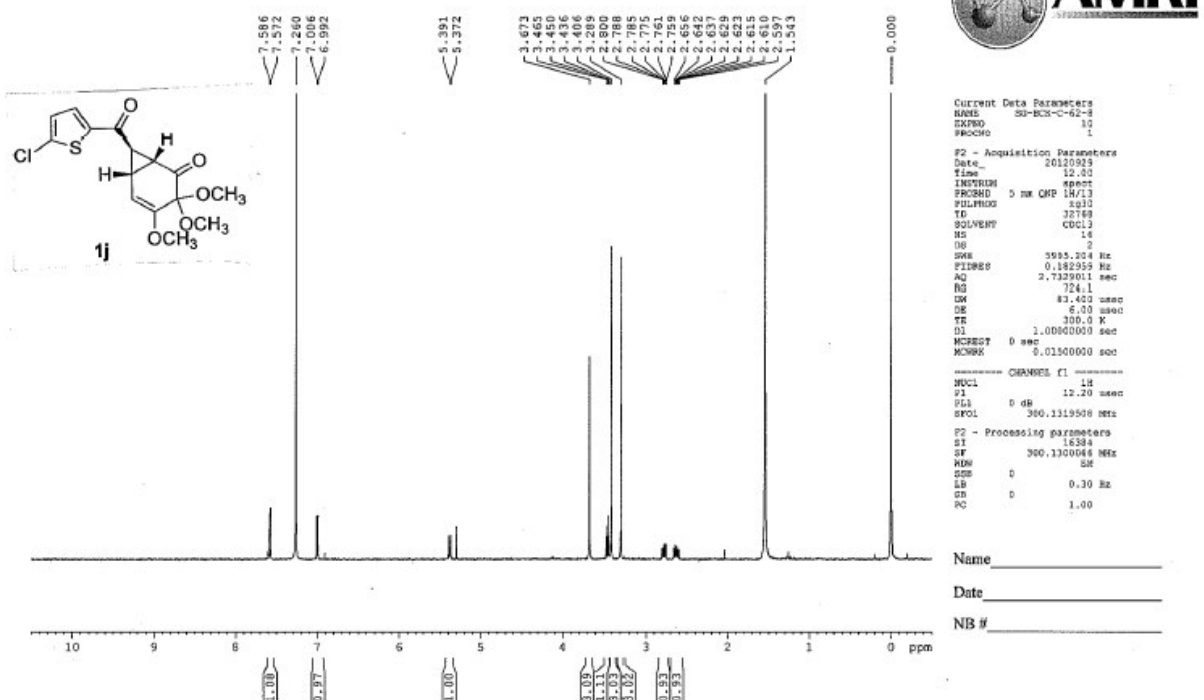

AMRI; SRC  
location; 15

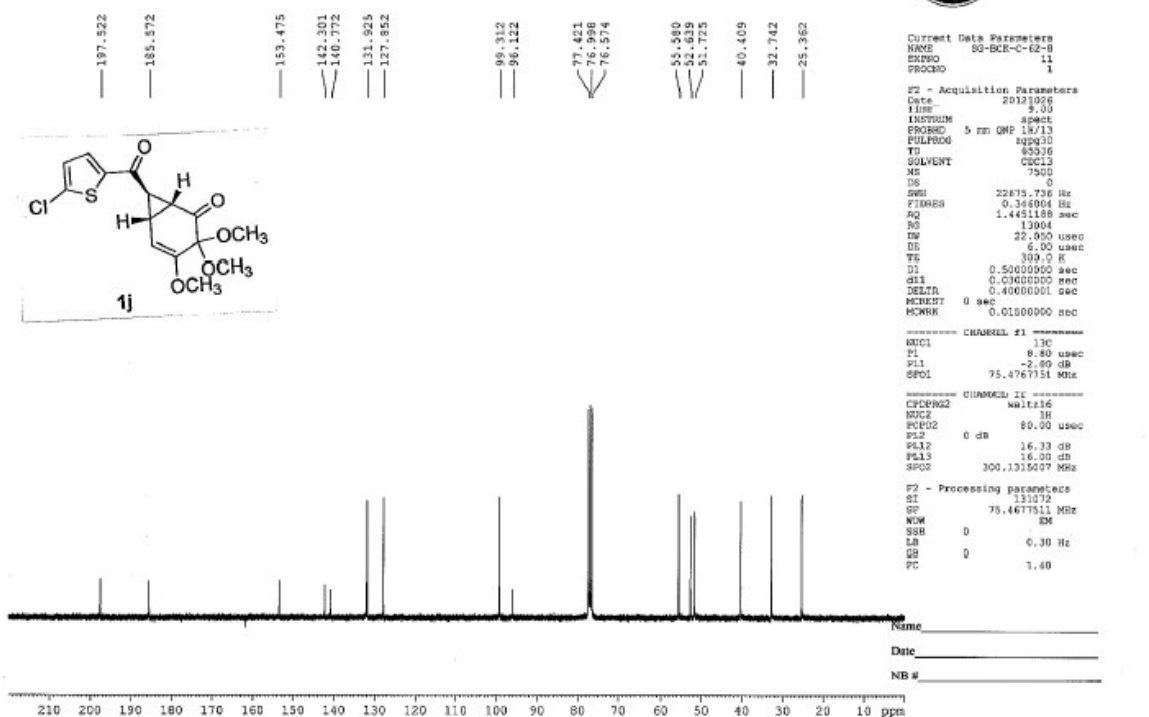

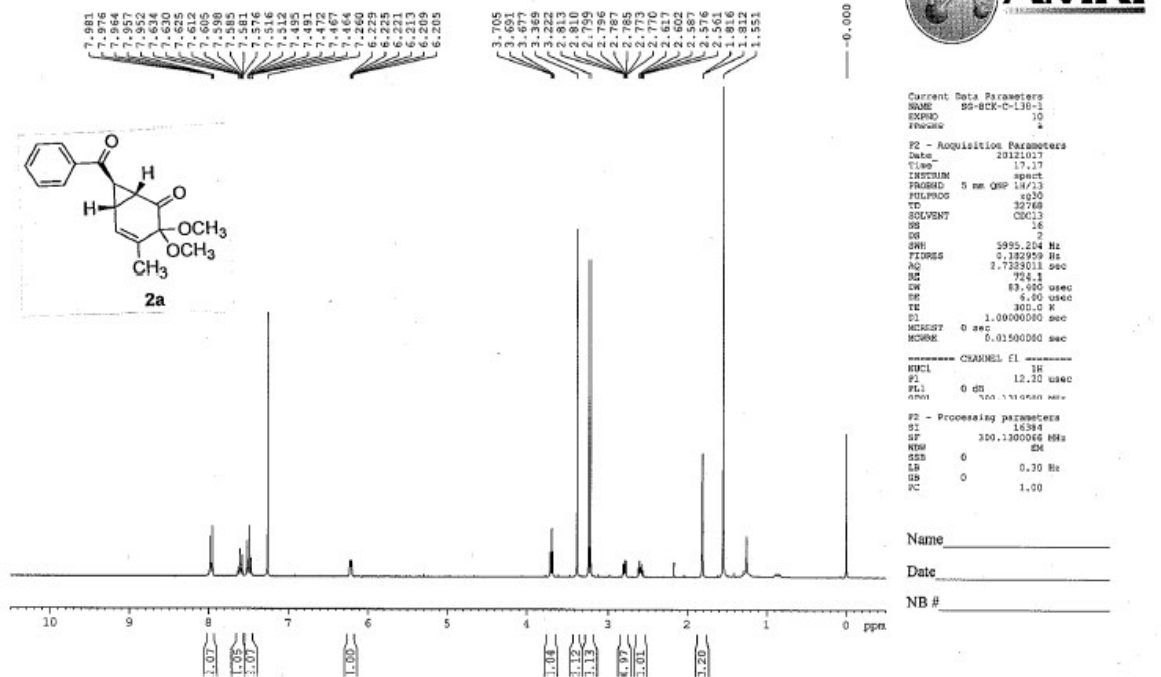

AMRI; SRC  
location; 15

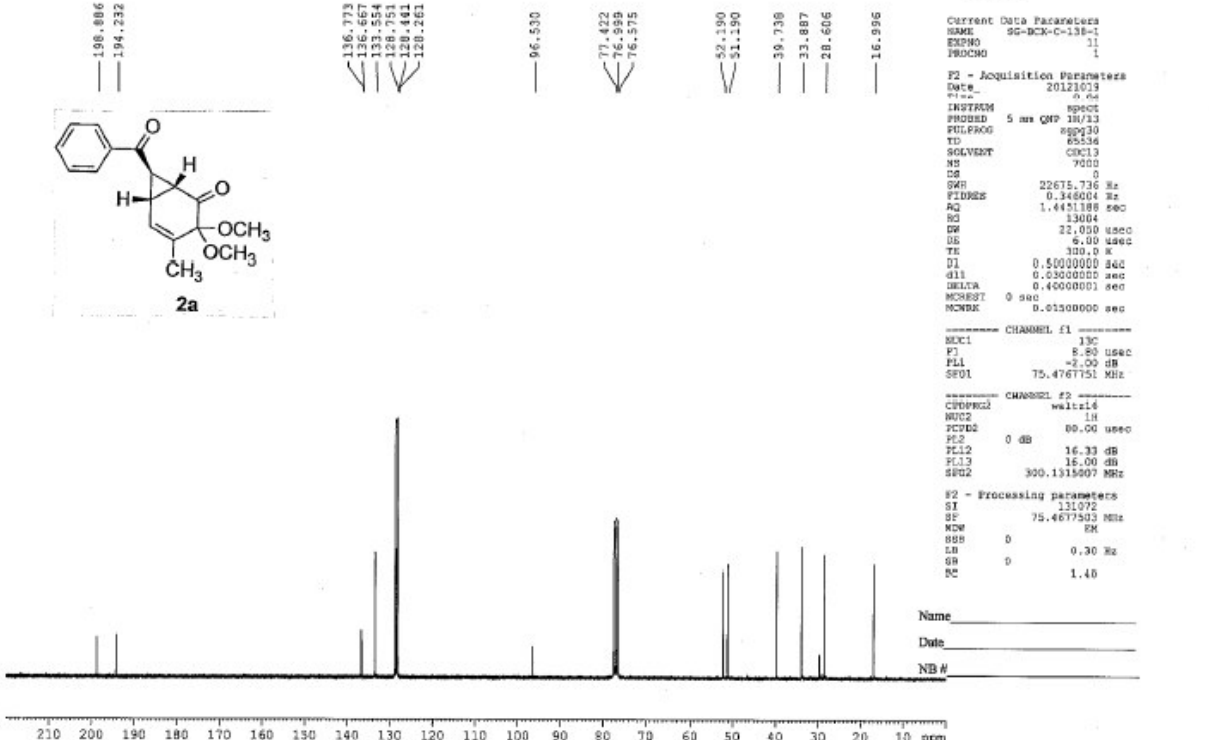

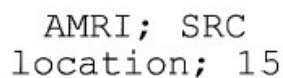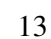

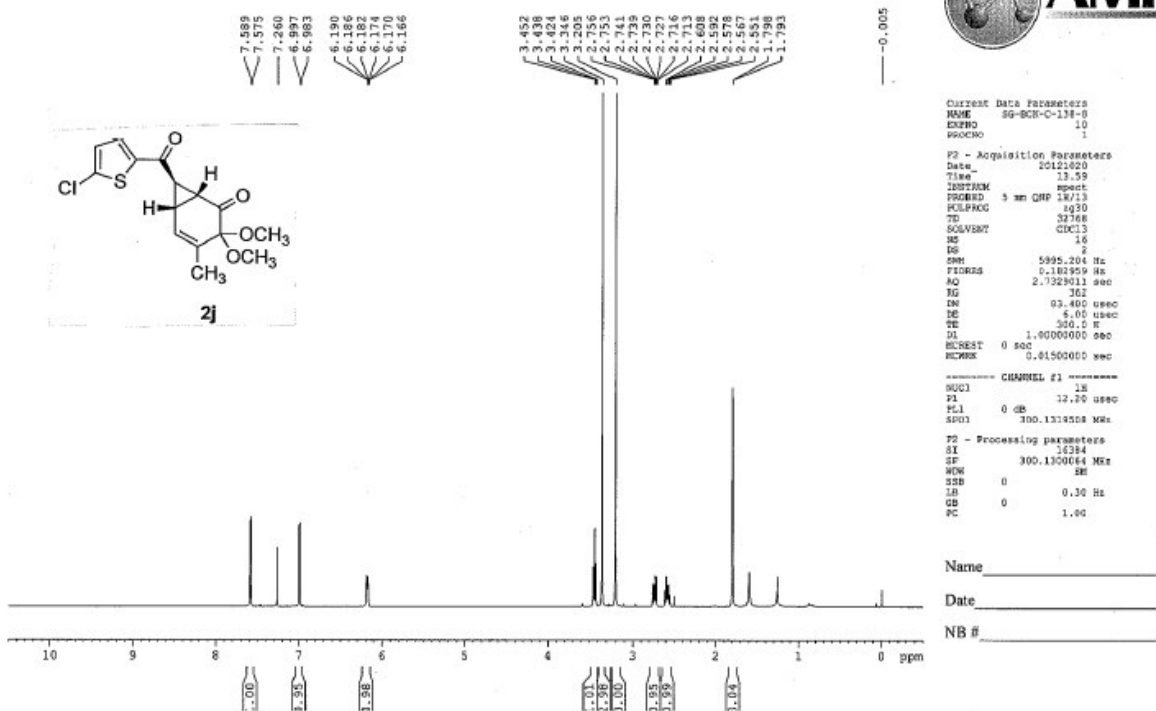

AMRI; SRC  
location; 15

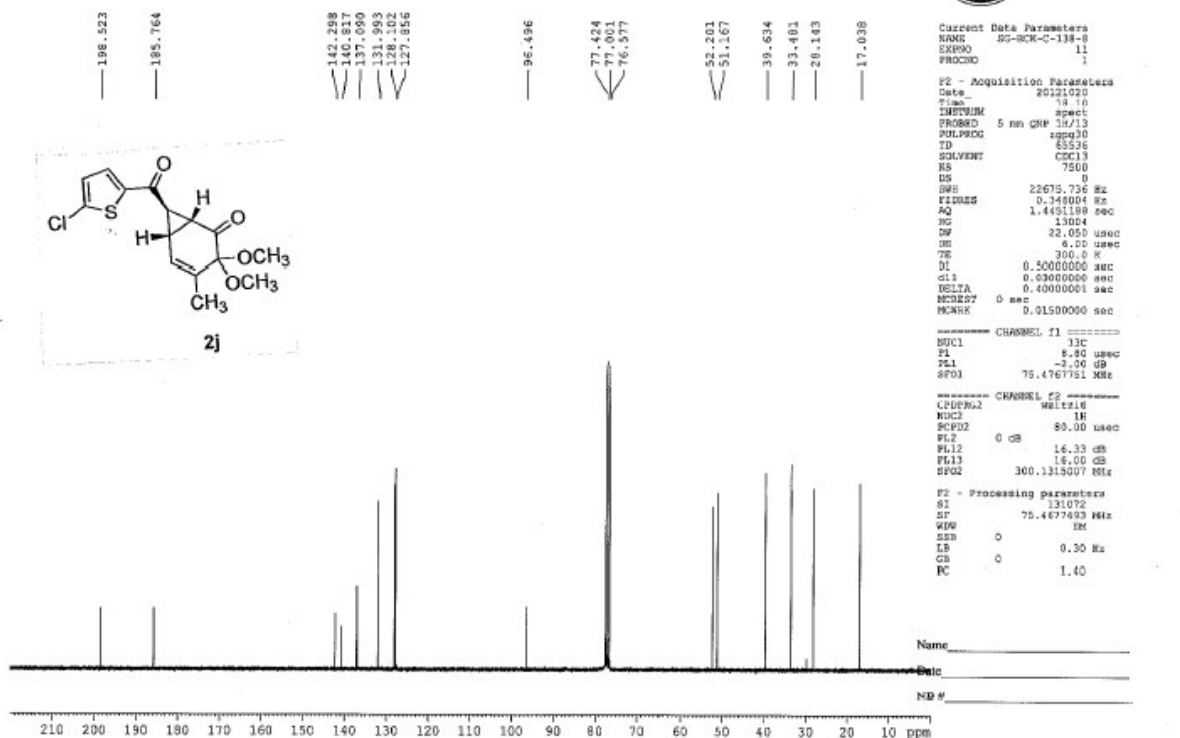



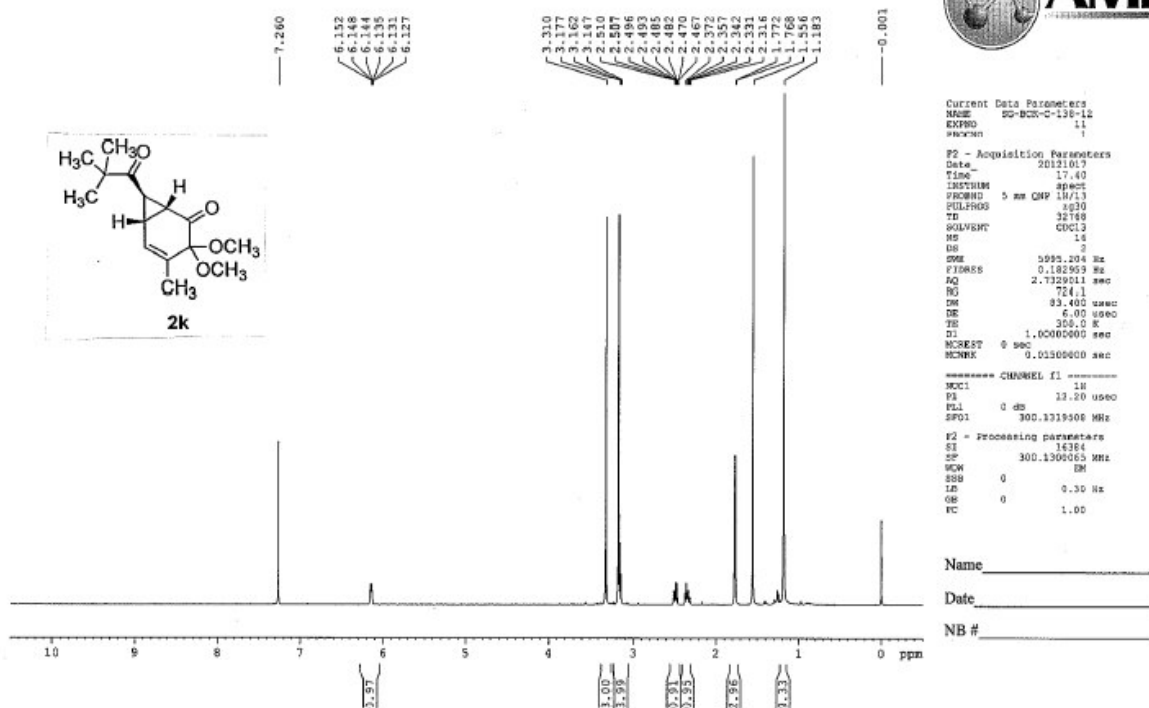

AMRI; SRC  
location; 15

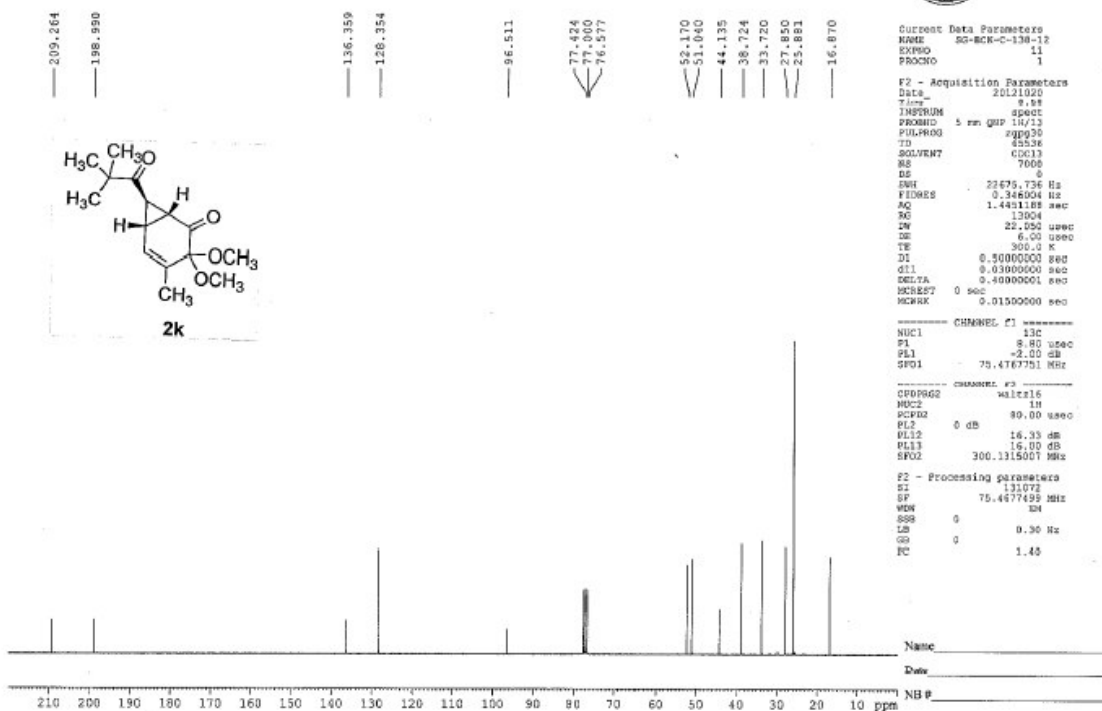



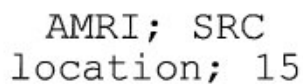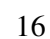

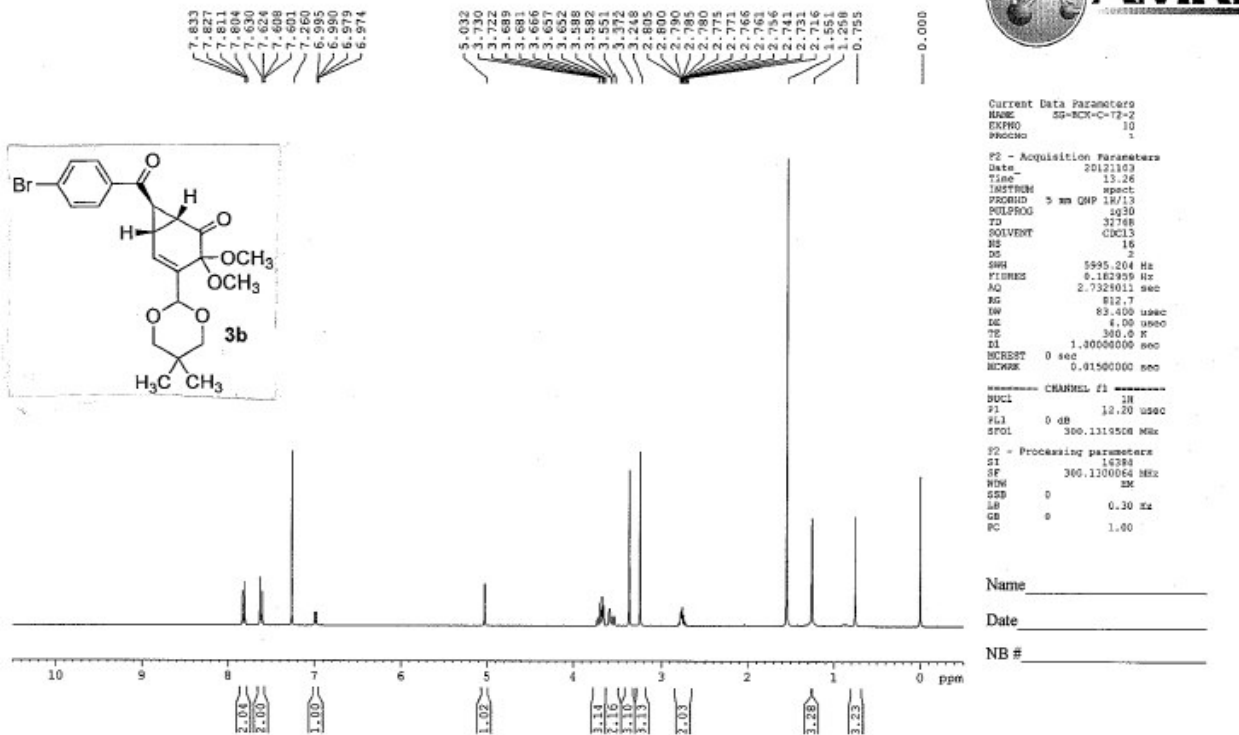

AMRI; SRC  
location; 15

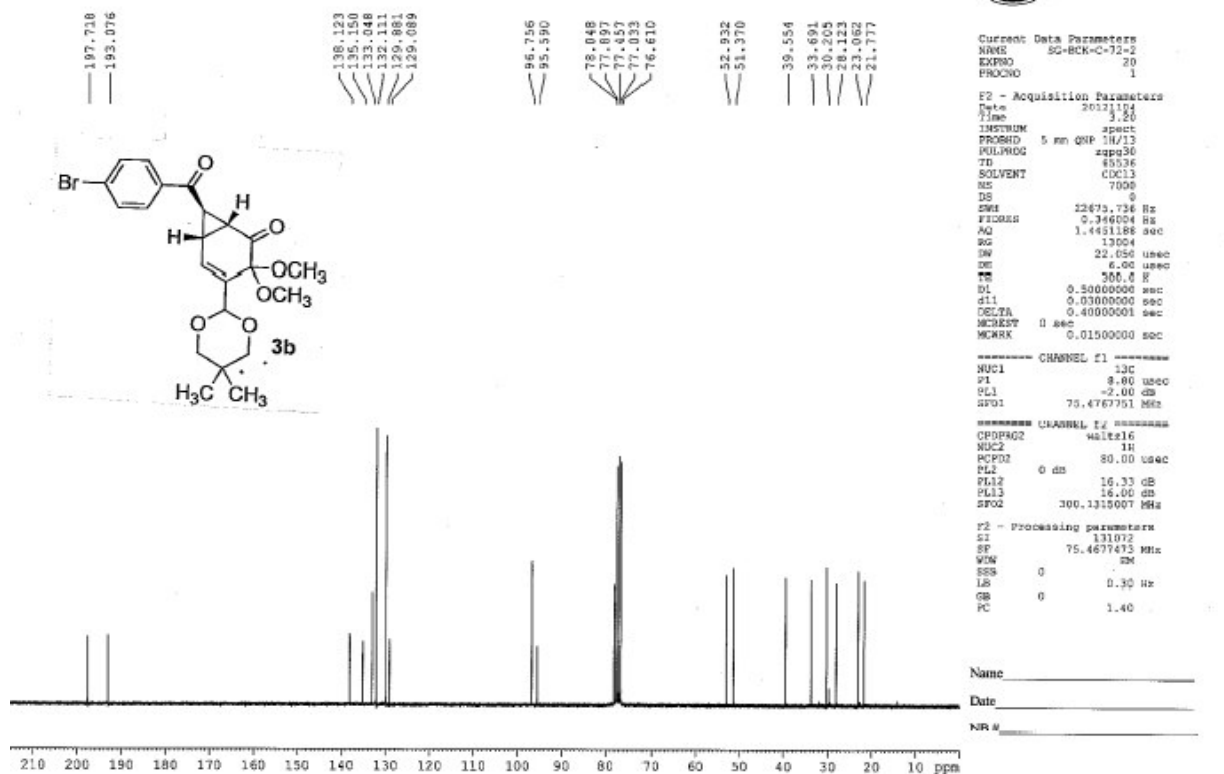

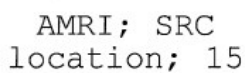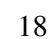

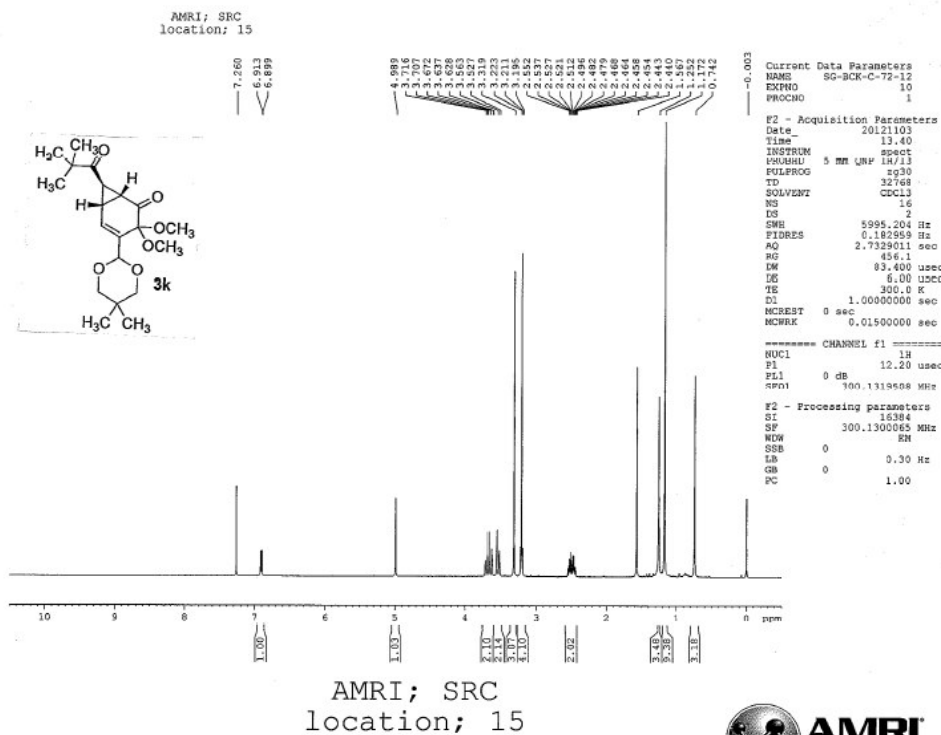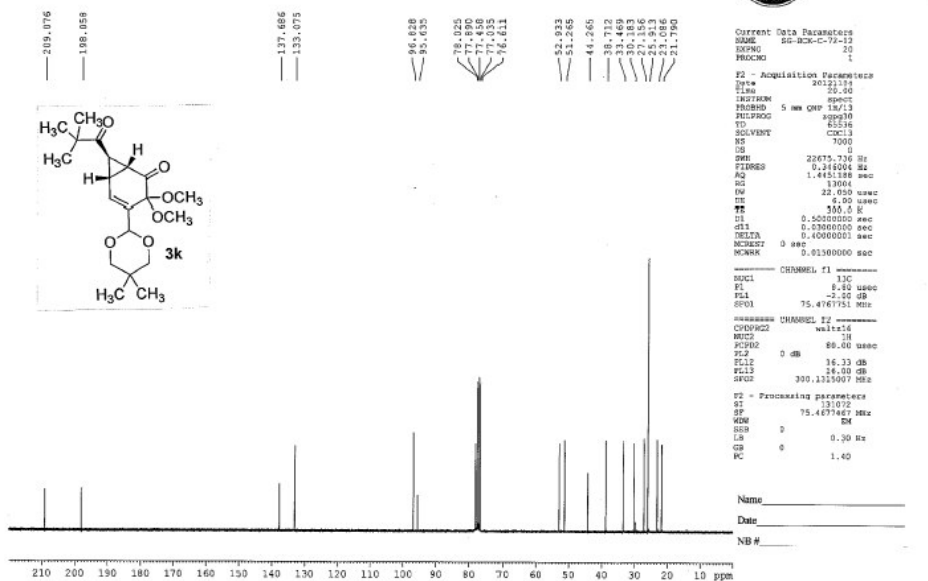

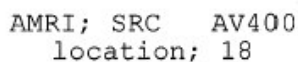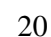

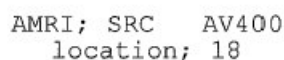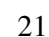



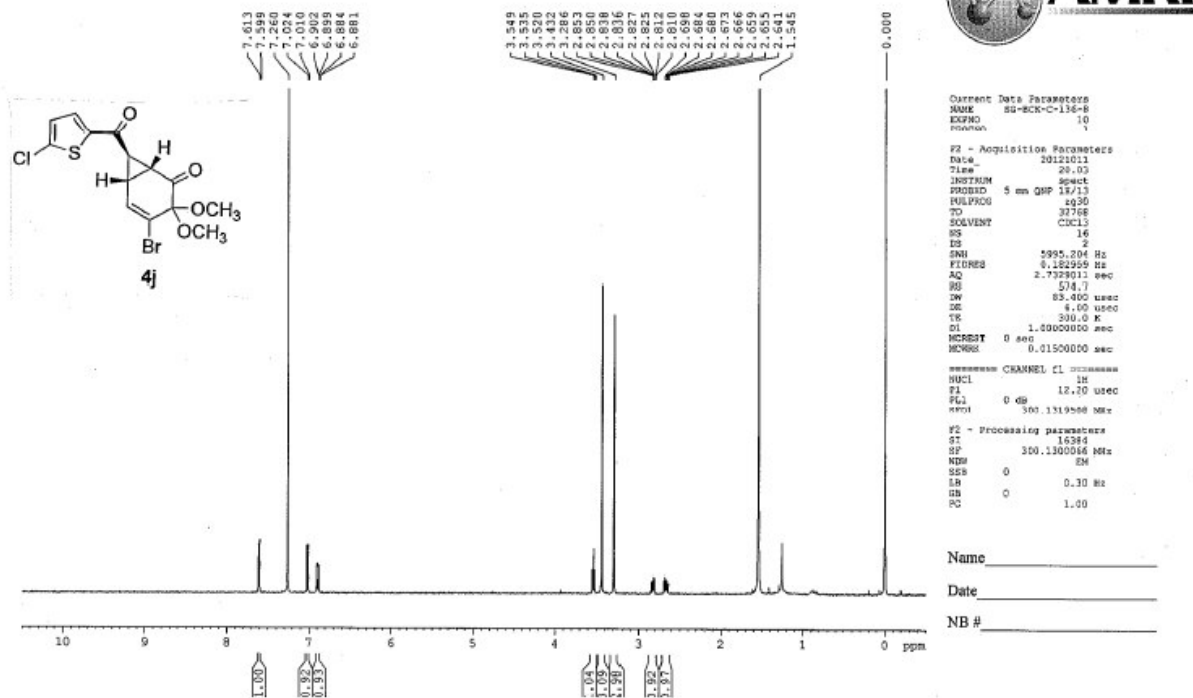

AMRI; SRC  
location; 15

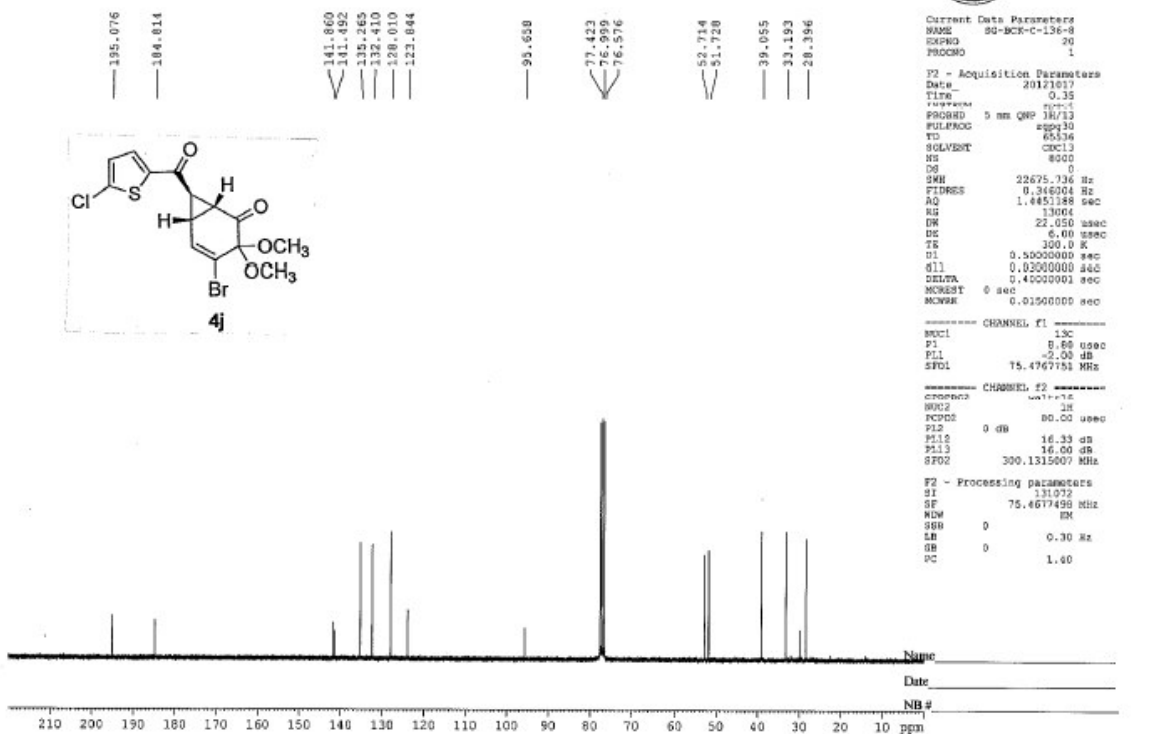



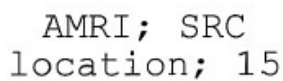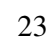

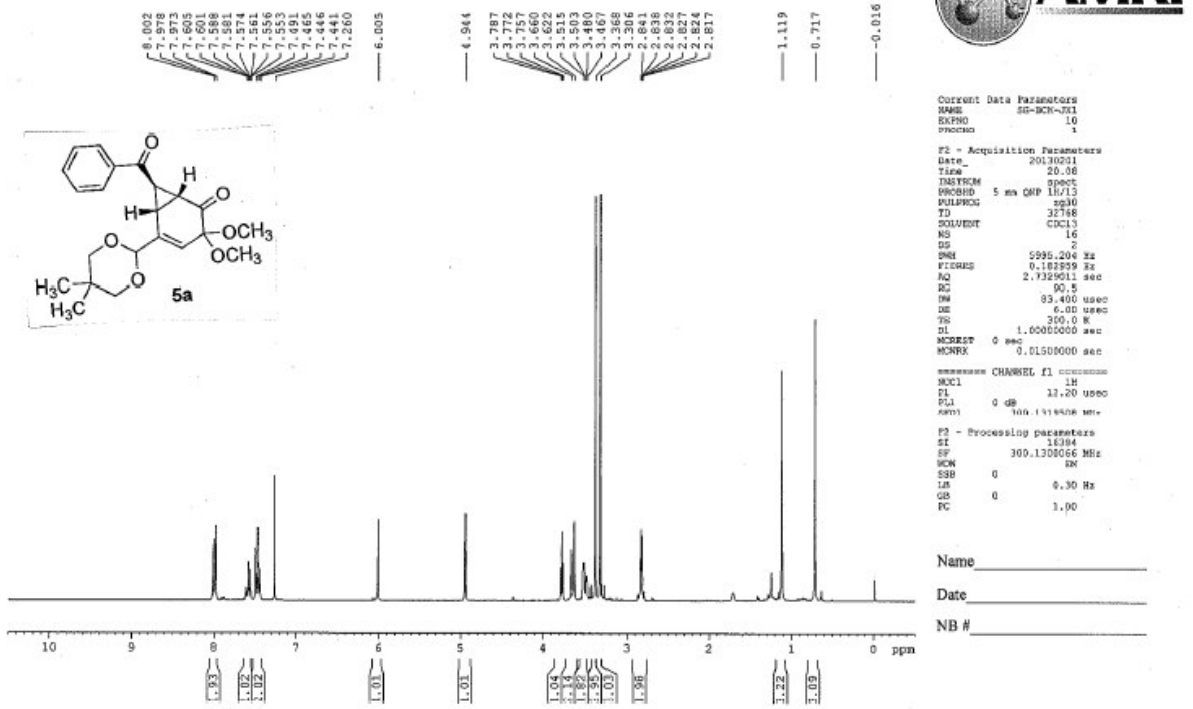

AMRI; SRC  
location; 15

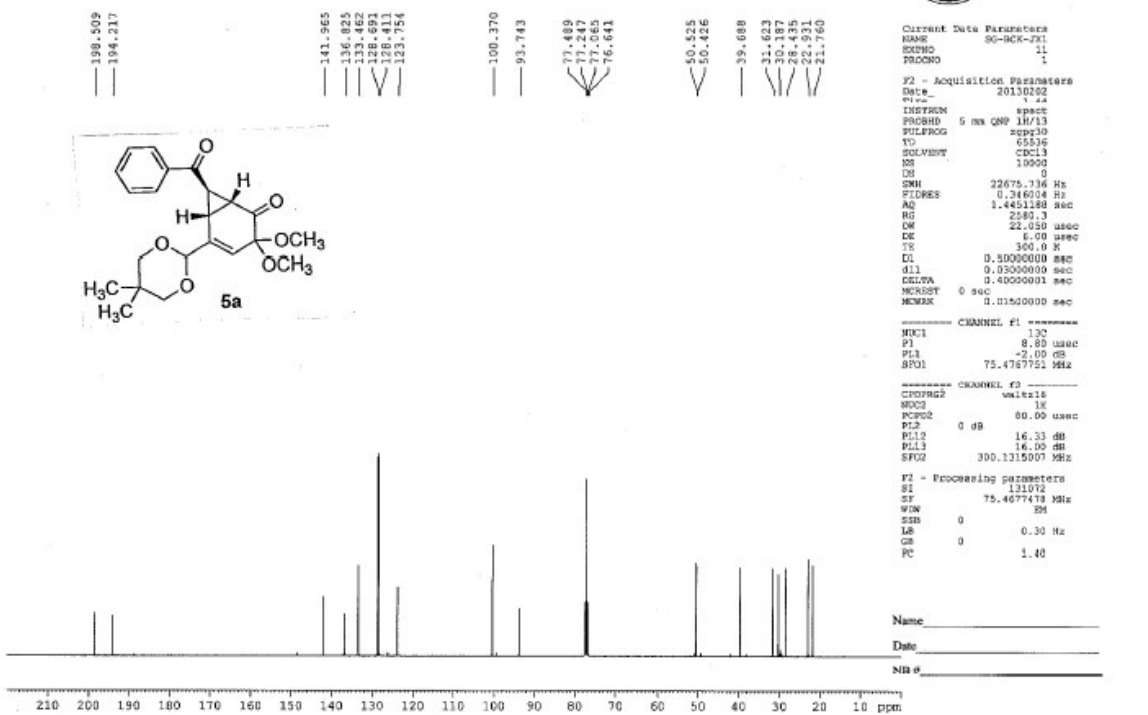

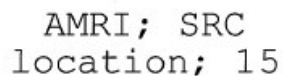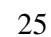

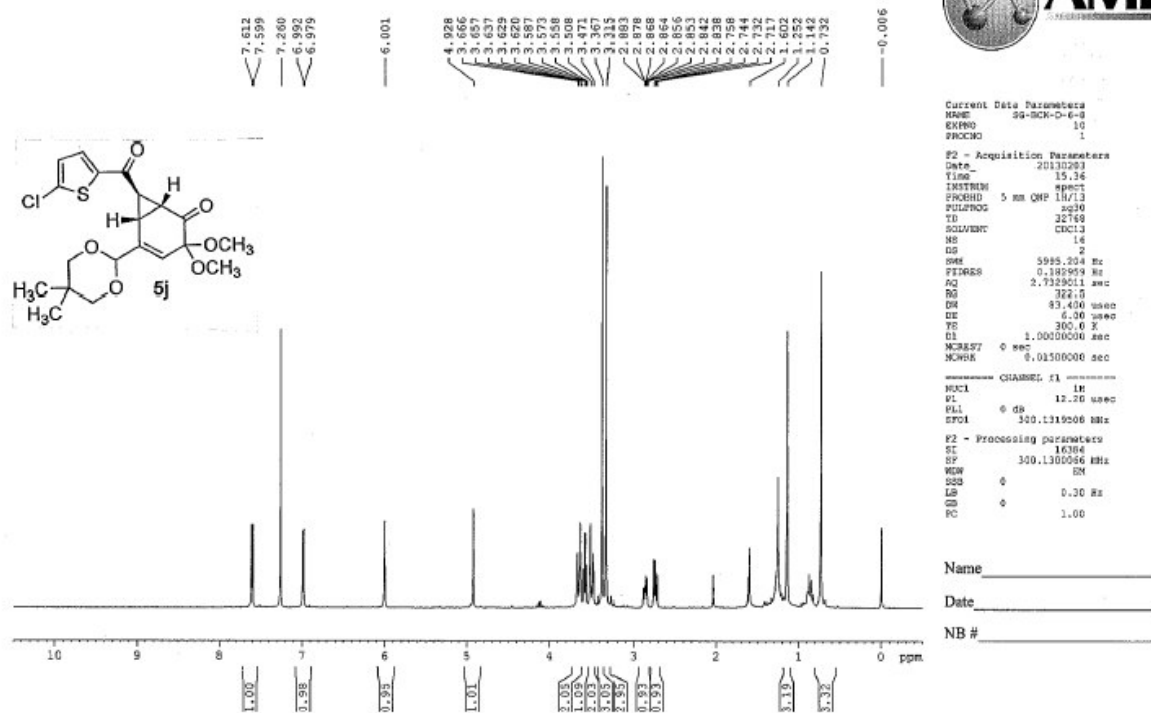

AMRI; SRC  
location; 15

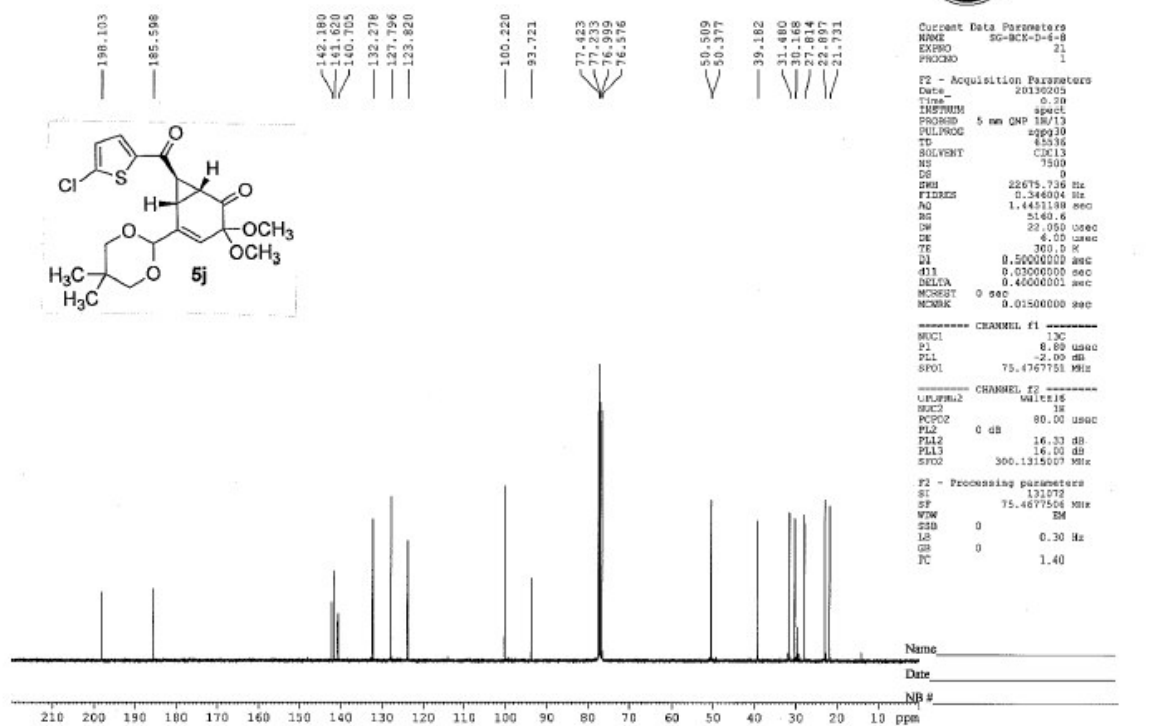

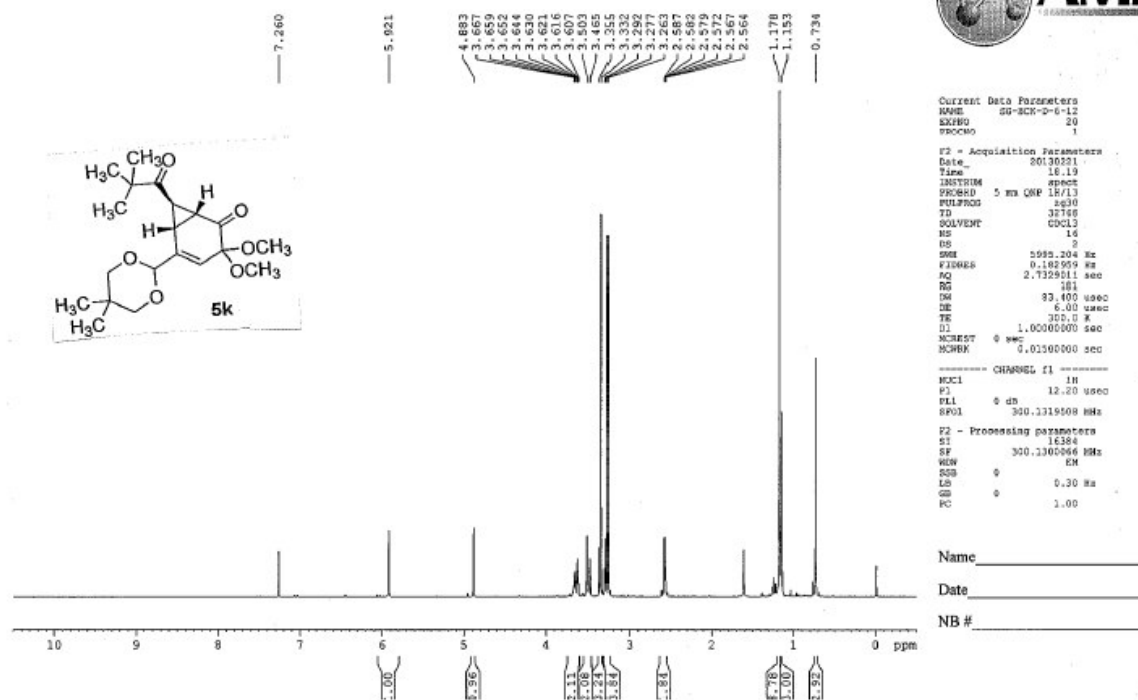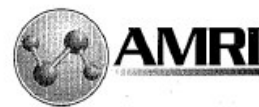

Current Data Parameters  
NAME: 50-BCK-D-6-12  
EXPNO: 20  
PROCNO: 1

F2 - Acquisition Parameters  
Date\_: 20130221  
Time: 16.13  
INSTRUM: spect  
PROBHD: 5 mm QNP 1H/13  
PULPROG: zgpg30  
TD: 32768  
SOLVENT: CDCl<sub>3</sub>  
NS: 14  
DS: 0  
SWH: 5995.204 KHz  
FIDRES: 0.182505 KHz  
AQ: 2.7325911 sec  
RG: 181  
IN: 93.400 usec  
DE: 6.00 usec  
TE: 300.2 K  
D1: 1.00000000 sec  
d11: 0.00000000 sec  
d12: 0.01500000 sec

===== CHANNEL f1 =====  
NUC1: 13C  
P1: 12.20 usec  
PL1: 0 dB  
SFO1: 300.1315000 MHz

F2 - Processing parameters  
SI: 16384  
SF: 300.1300000 MHz  
WDW: EM  
SSB: 0  
LB: 0.30 KHz  
GB: 0  
PC: 1.00

Name: \_\_\_\_\_  
Date: \_\_\_\_\_  
NB #: \_\_\_\_\_

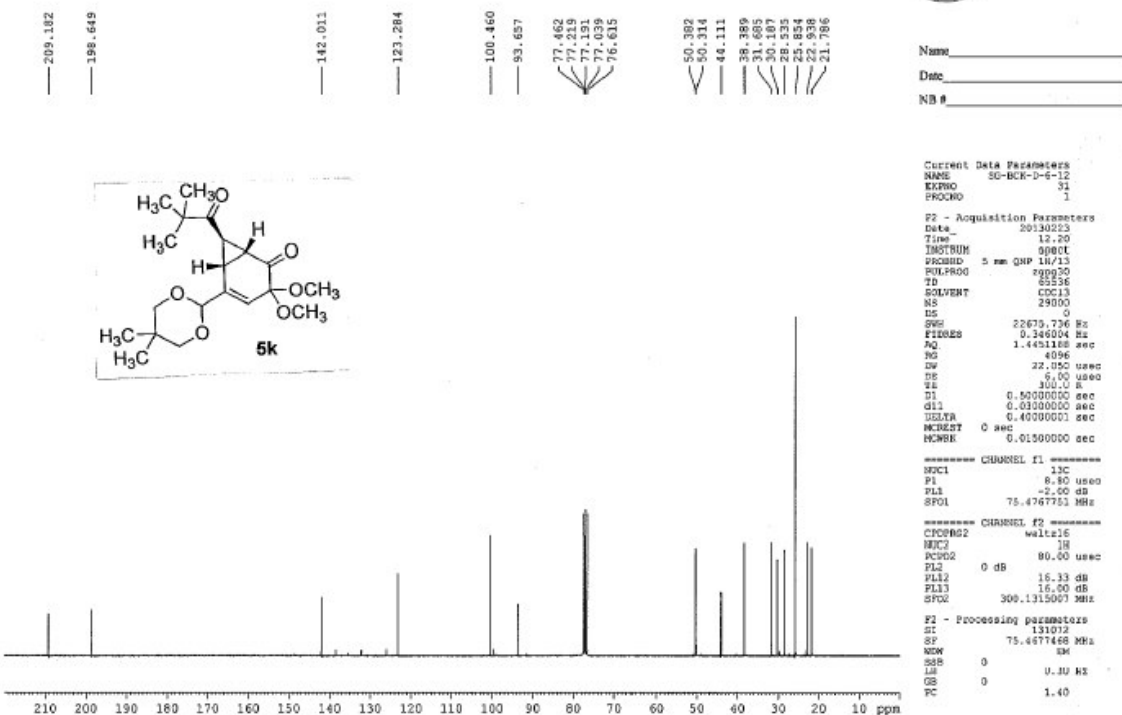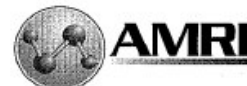

Name: \_\_\_\_\_  
Date: \_\_\_\_\_  
NB #: \_\_\_\_\_

Current Data Parameters  
NAME: 50-BCK-D-6-12  
EXPNO: 31  
PROCNO: 1

F2 - Acquisition Parameters  
Date\_: 20130223  
Time: 12.20  
INSTRUM: spect  
PROBHD: 5 mm QNP 1H/13  
PULPROG: zgpg30  
TD: 65536  
SOLVENT: CDCl<sub>3</sub>  
NS: 29000  
DS: 0  
SWH: 22679.736 KHz  
FIDRES: 0.345004 KHz  
AQ: 1.4451188 sec  
RG: 4096  
IN: 22.050 usec  
DE: 6.00 usec  
TE: 300.2 K  
D1: 0.50000000 sec  
d11: 0.03000000 sec  
d12: 0.40000001 sec  
d13: 0.00000000 sec  
d14: 0.00000000 sec  
d15: 0.01500000 sec

===== CHANNEL f1 =====  
NUC1: 13C  
P1: 8.80 usec  
PL1: -2.00 dB  
SFO1: 75.4767251 MHz

===== CHANNEL f2 =====  
CPDPRG2: waltz16  
NUC2: 1H  
PCPD2: 90.00 usec  
PL2: 0 dB  
PL12: 16.33 dB  
PL13: 16.50 dB  
SFO2: 300.1315000 MHz

F2 - Processing parameters  
SI: 131072  
SF: 75.4677468 MHz  
WDW: EM  
SSB: 0  
LB: 0.30 KHz  
GB: 0  
PC: 1.40

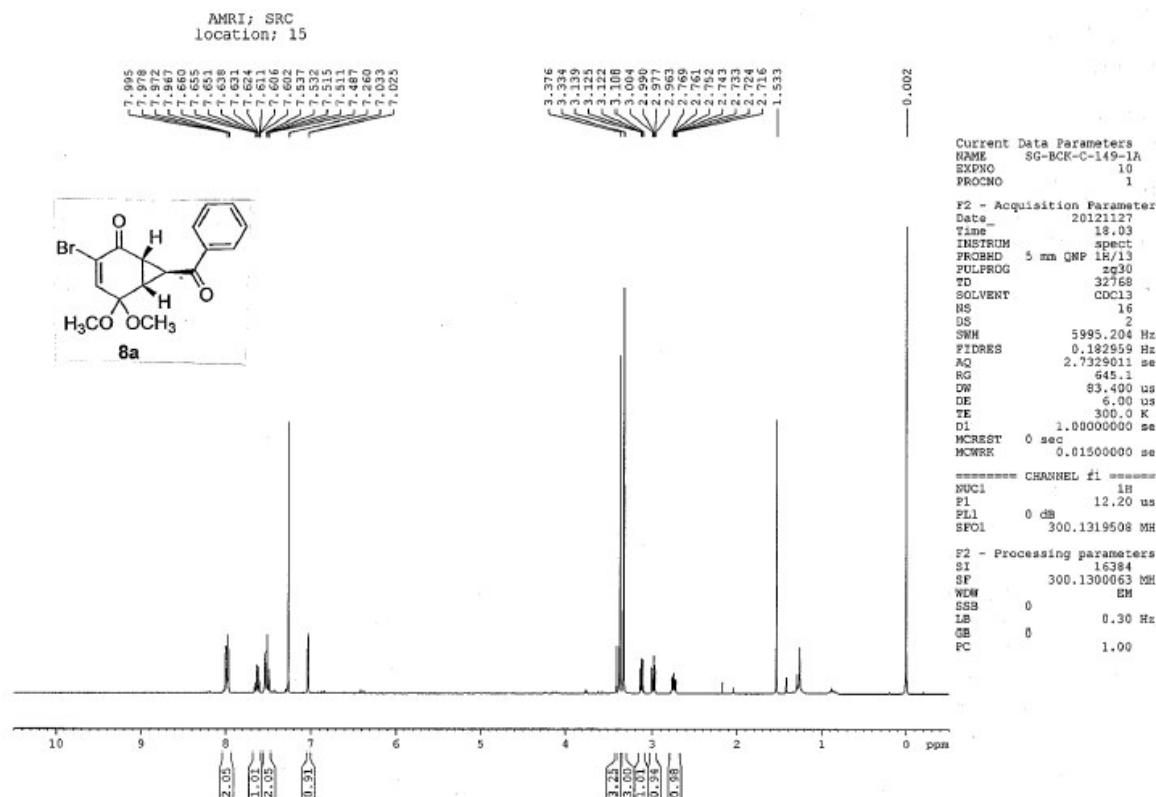

AMRI; SRC  
location; 15

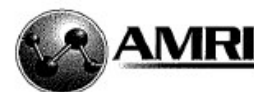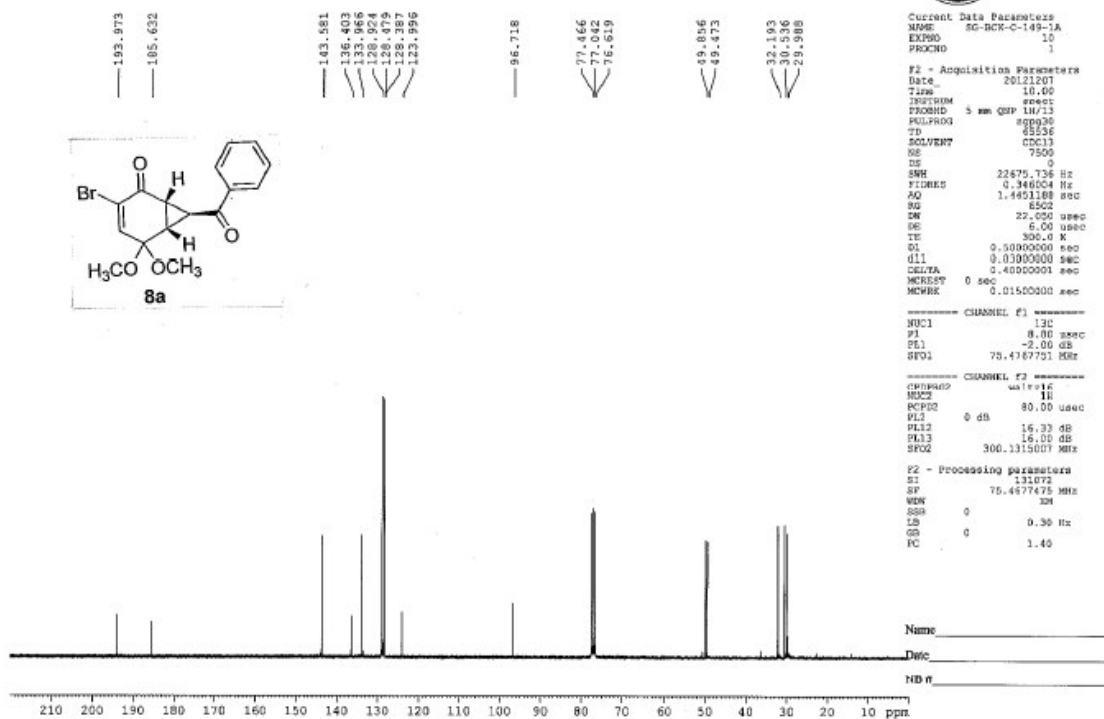







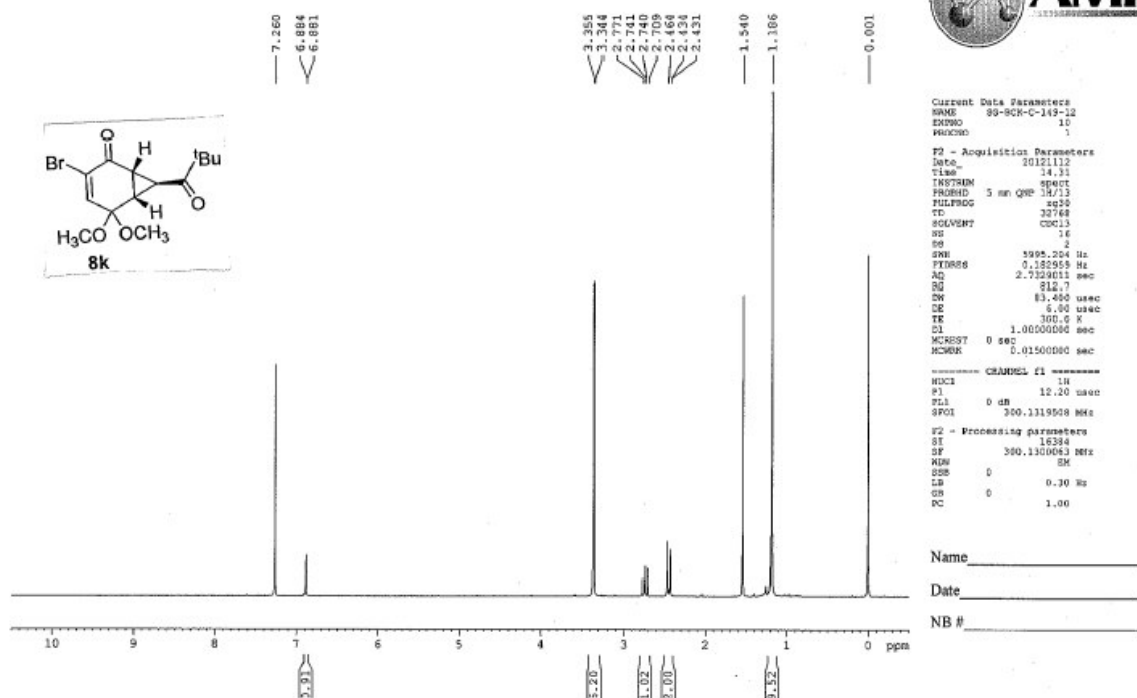

AMRI; SRC  
location; 15

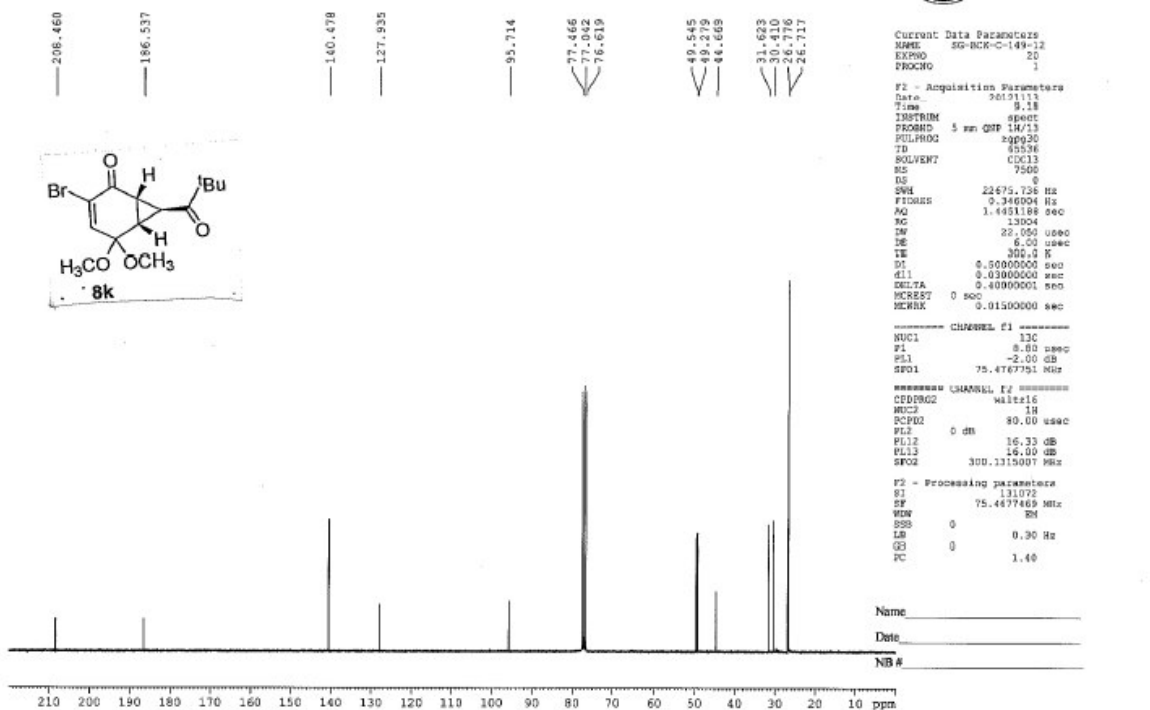

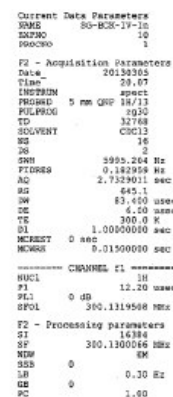

Name \_\_\_\_\_  
Date \_\_\_\_\_  
NB # \_\_\_\_\_

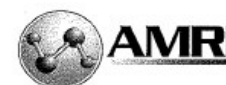

```

Current data parameters
NAME          SW-BKCH-1v1a
EXPNO         1
PROCNO        1
F2 - Acquisition parameters
Date_         20130305
Time          0.19
INSTRUM       spect
PROBHD        5 mm QNP 1H/13
PULPROG       zgpg30
TD            65536
FIDRES        0.000130
AQ            0.001000
RG            327.5
DE            22.50 use
WE            6.00 use
TE            300.2
D1            0.50000000 sec
d11           0.03000000 sec
d12           0.45000000 sec
MAGNET       o ac
HWCSS        0.05000000 sec
===== CHANNEL f1 =====
NUC1          13C      1.0130432 MHz
P1            1.80 use
PC            2.00 use
PL1          -2.00 dB
SFO1         75.476477 MHz
===== CHANNEL f2 =====
CPDPRG2       waltz16
NUC2          1H       500.136049 MHz
P2            1.00 use
PC2           1.00 use
PL2          0 dB
PL12          16.33 dB
PL13          16.00 dB
PL14          16.00 dB
SFO2         300.135097 MHz
F2 - Processing parameters
SI            214072
SF           75.476477 MHz
GB           0
RG           327.5
DE            0.0300 sec
TE            300.2 K
LB            0
GB           0
PC            1.40

```

Name \_\_\_\_\_  
Date \_\_\_\_\_  
NB # \_\_\_\_\_

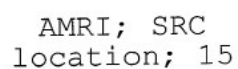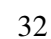

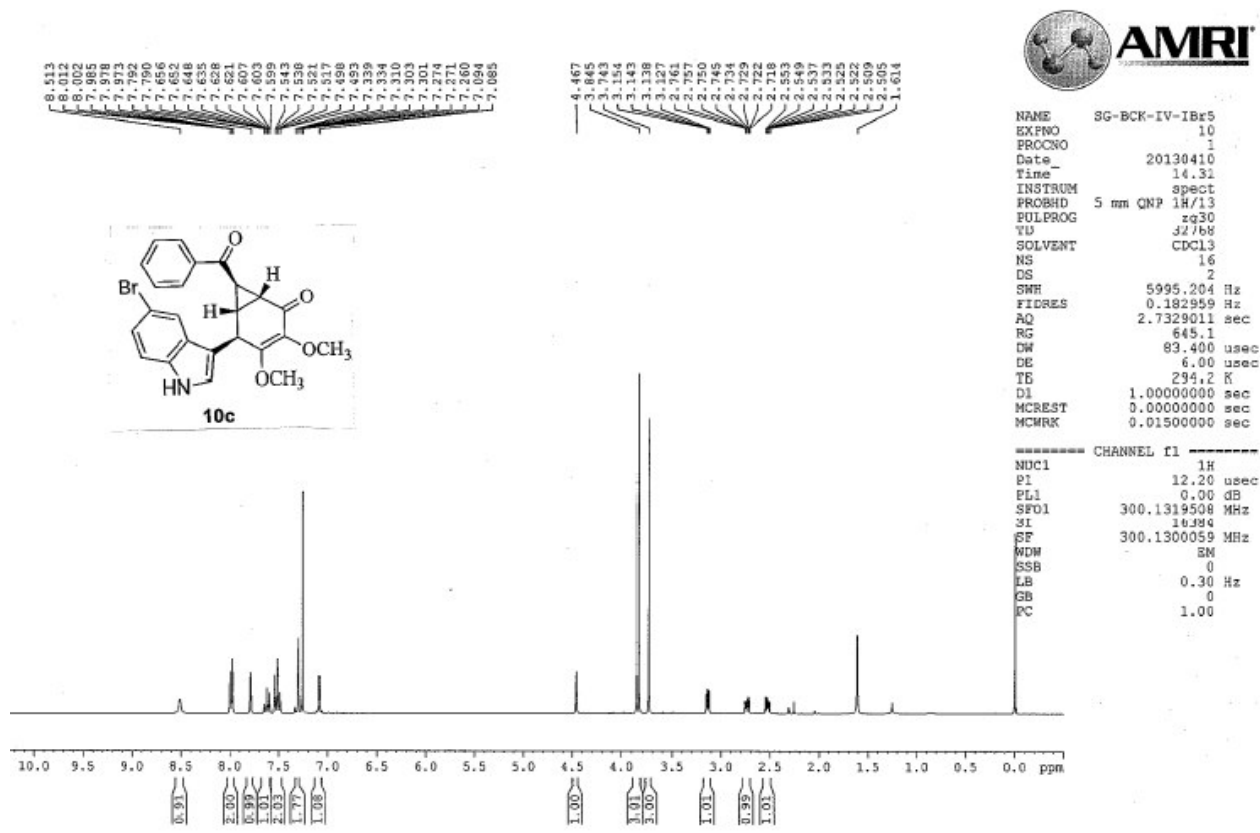

AMRI; SRC  
location; 15

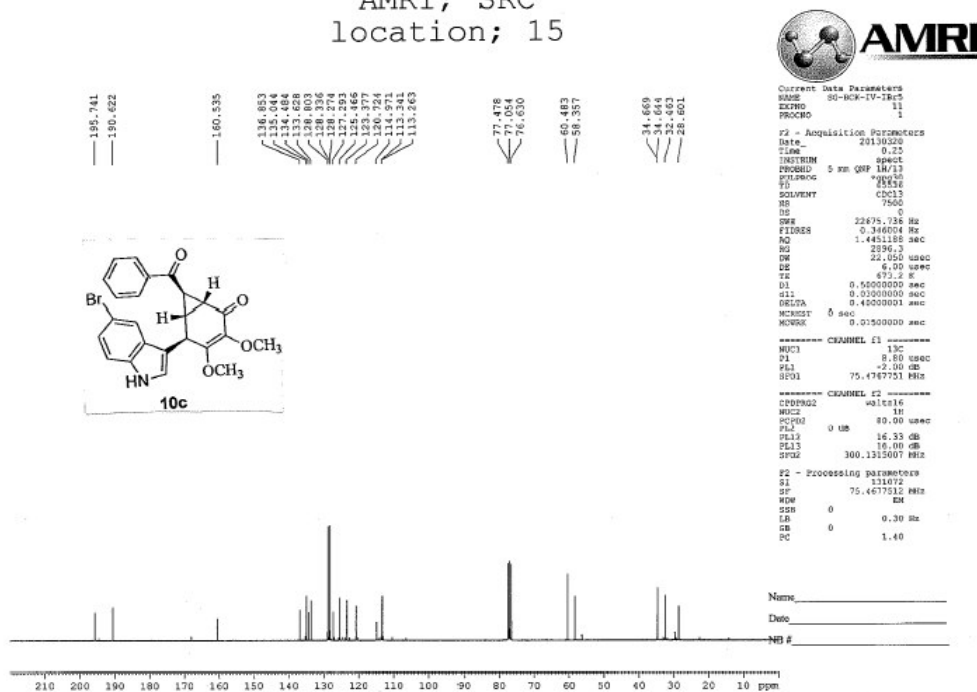

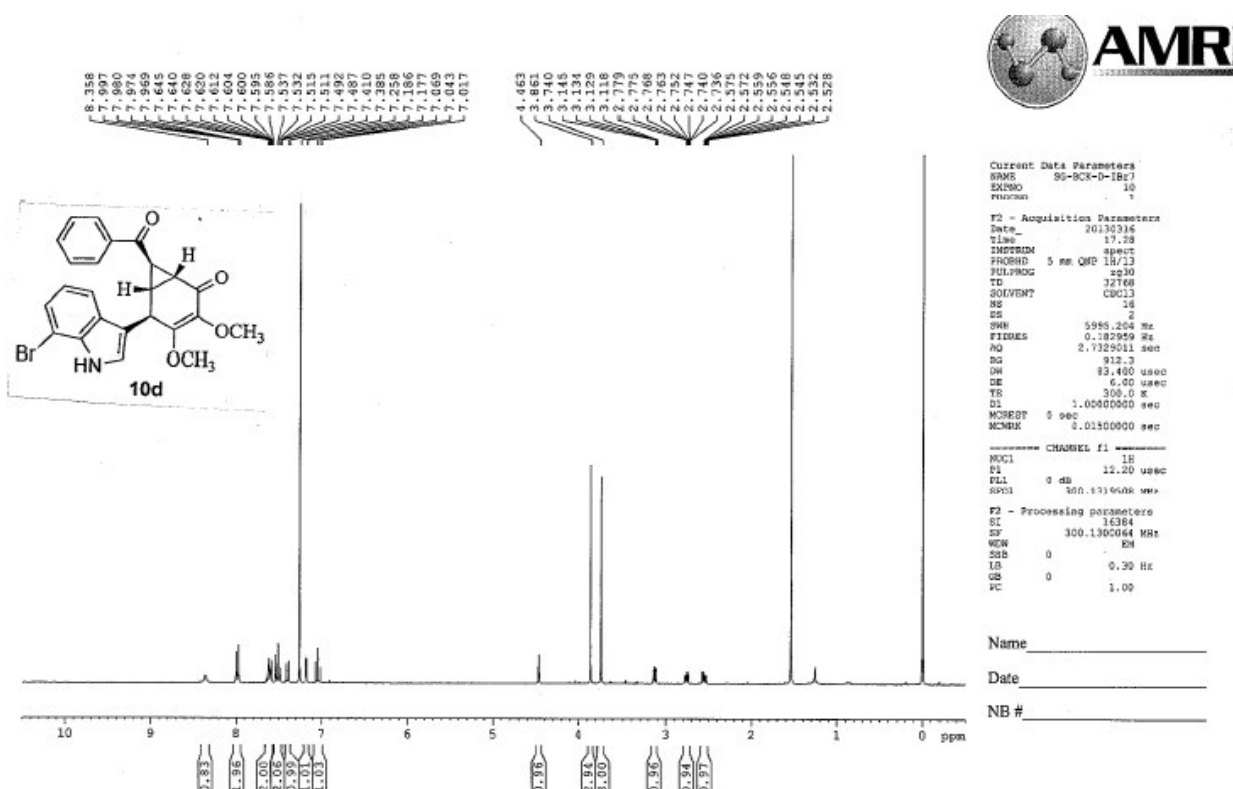

AMRI; SRC  
location; 15

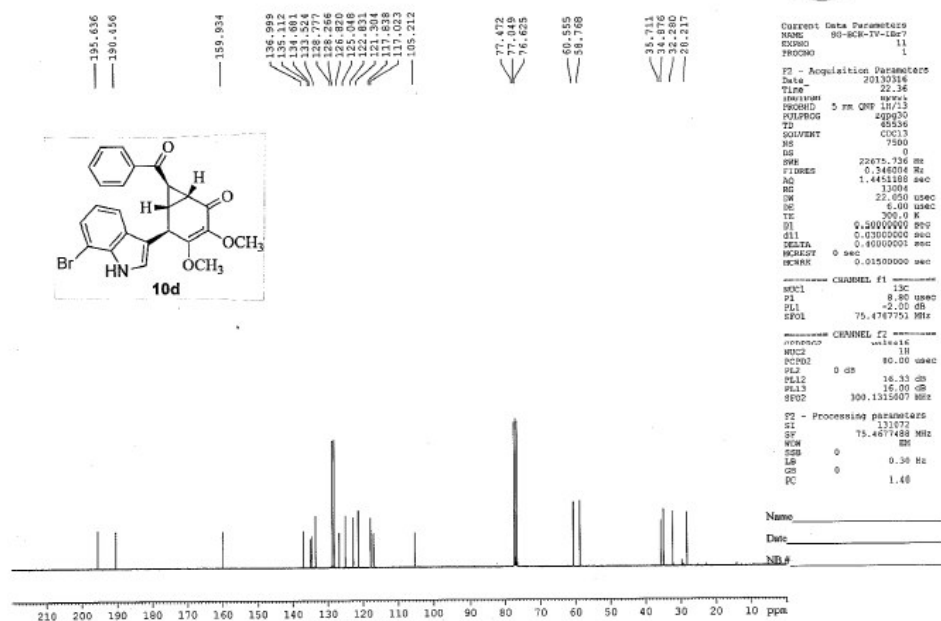

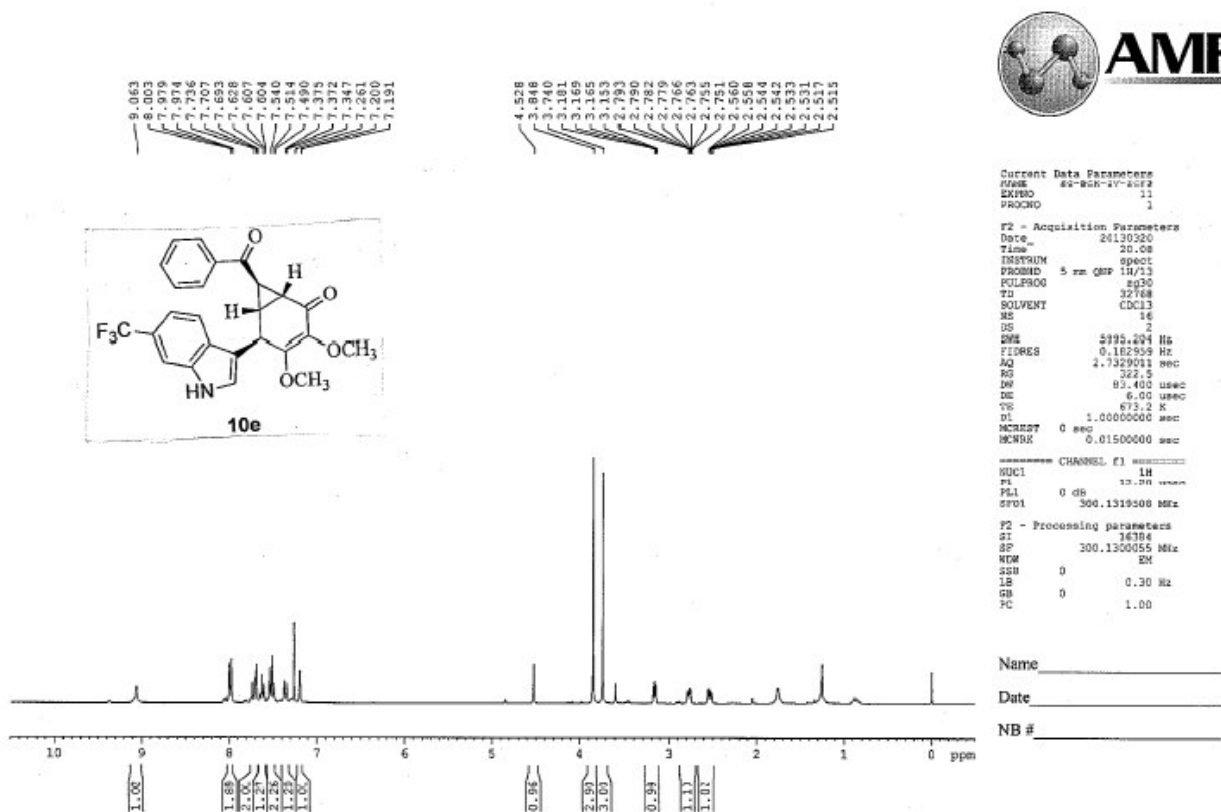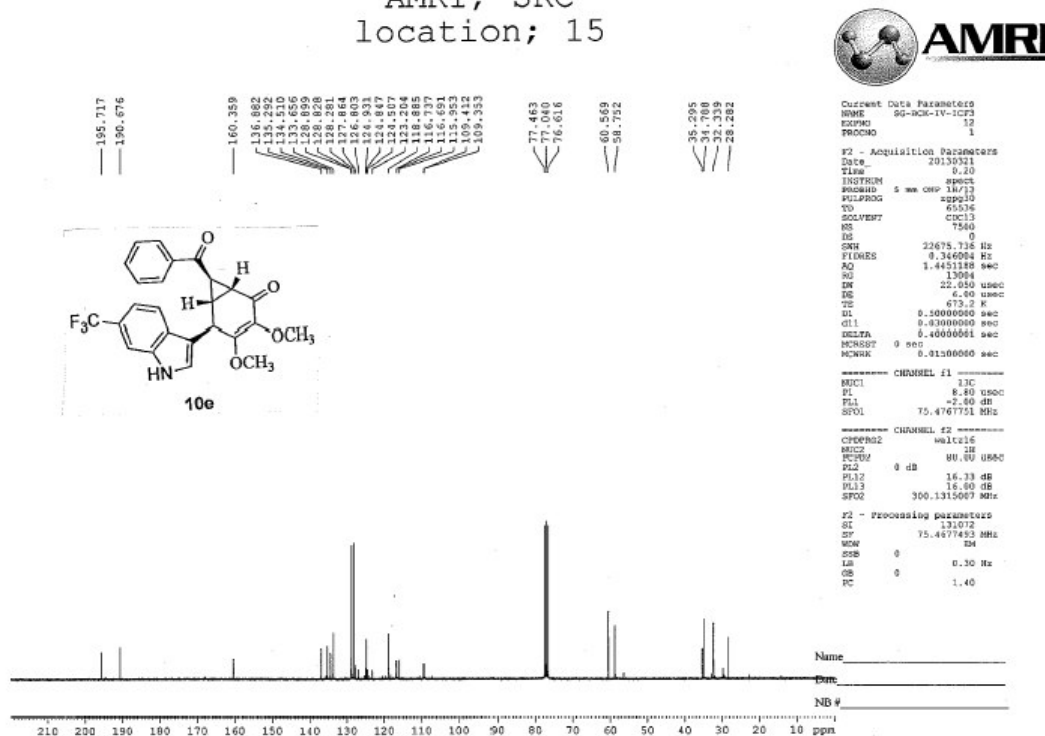



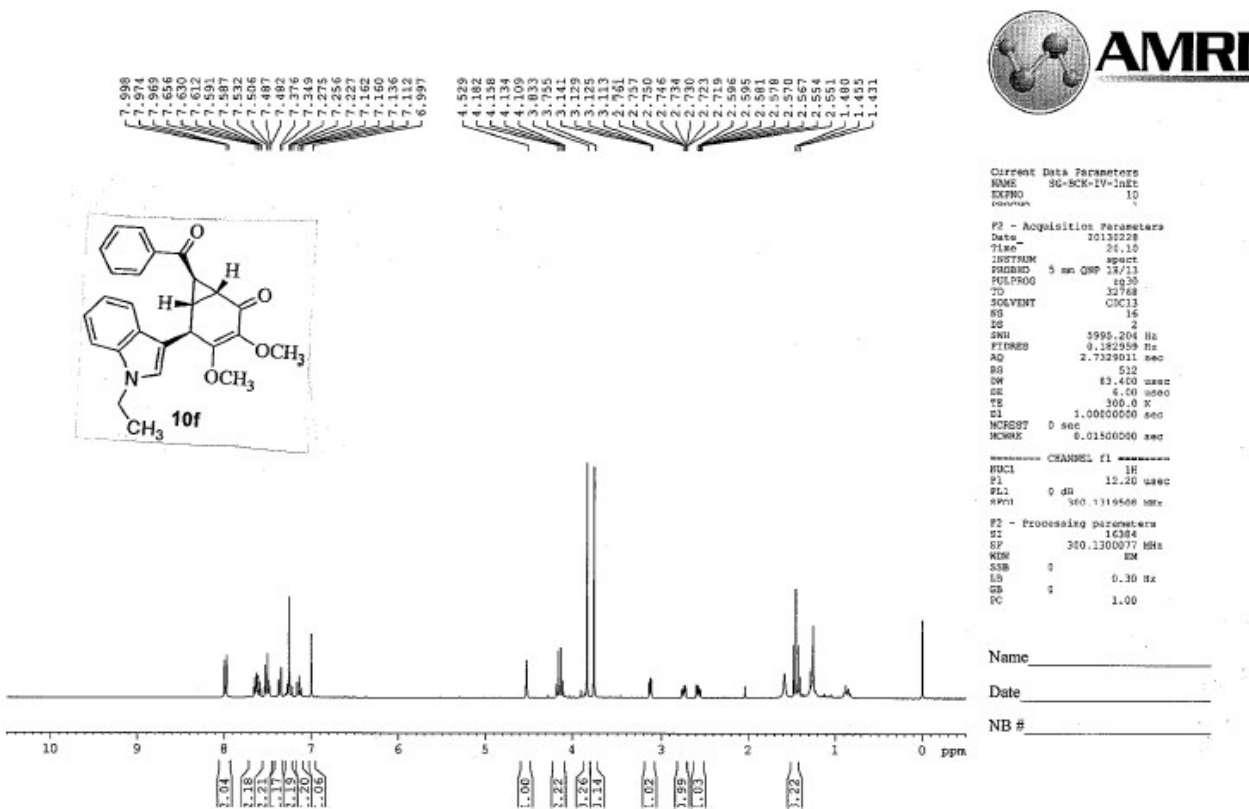

AMRI; SRC  
location; 15

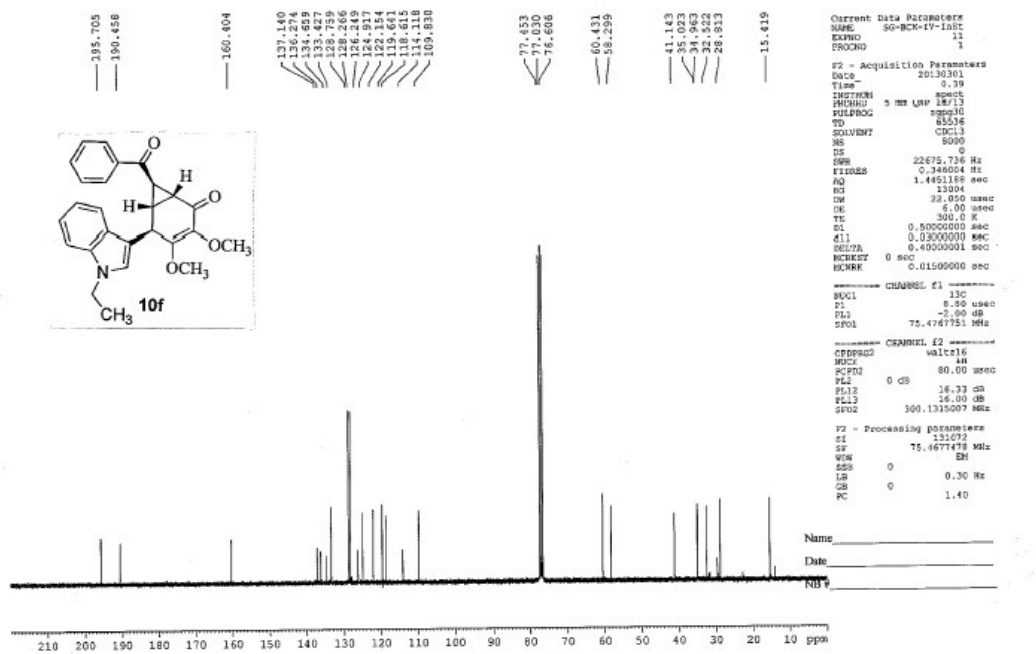



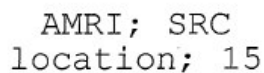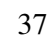

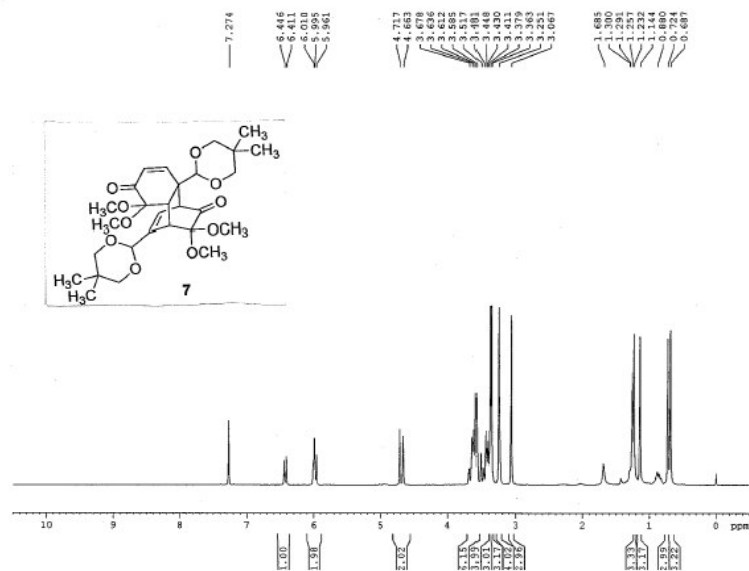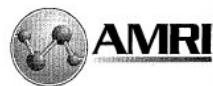

Current Data Parameters  
NAME 26-BCH-Bdmer  
EXPNO 10  
PROCNO 1  
F2 - Acquisition Parameters  
Date\_ 20130402  
Time 20.50  
INSTRUM spect  
PROBHD 5 mm QNP 1H/13  
PULPROG zgpg30  
TD 65536  
SOLVENT CDCl3  
NS 1500  
DS 4  
SWH 5955.234 Hz  
FIDRES 0.182339 Hz  
AQ 2.7329911 sec  
RG 641  
DM 83.430 usec  
DE 6.50 usec  
TE 300.2 K  
D1 1.00000000 sec  
MCREST 0 sec  
MCMR 0.01500000 sec  
===== CHANNEL f1 =====  
NUC1 13C  
P1 12.20 usec  
PL1 0 dB  
SFO1 300.1319508 MHz  
F2 - Processing parameters  
SI 13136  
SF 300.1300015 MHz  
WDW DM  
SSB 0  
LB 0.30 Hz  
GB 0  
PC 1.00

Name \_\_\_\_\_  
Date \_\_\_\_\_  
NB # \_\_\_\_\_

AMRI; SRC  
location; 15

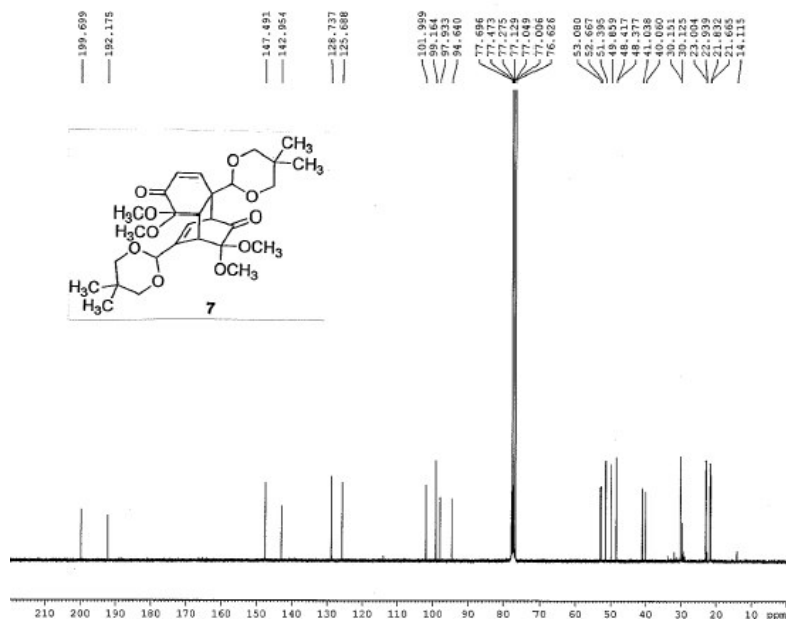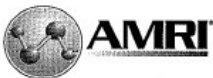

Name \_\_\_\_\_  
Date \_\_\_\_\_  
NB # \_\_\_\_\_

Current Data Parameters  
NAME 26-BCH-Bdmer  
EXPNO 11  
PROCNO 1  
F2 - Acquisition Parameters  
Date\_ 20130403  
Time 9.21  
INSTRUM spect  
PROBHD 5 mm QNP 1H/13  
PULPROG zgpg30  
TD 65536  
SOLVENT CDCl3  
NS 1500  
DS 4  
SWH 22675.736 Hz  
FIDRES 0.348004 Hz  
AQ 1.4121188 sec  
RG 13004  
DM 32.050 usec  
DE 6.50 usec  
TE 300.2 K  
D1 0.50000000 sec  
d11 0.03000000 sec  
DELTA 0.40000001 sec  
MCREST 0 sec  
MCMR 0.01500000 sec  
===== CHANNEL f1 =====  
NUC1 13C  
P1 6.80 usec  
PL1 -2.00 dB  
SFO1 75.4767751 MHz  
===== CHANNEL f2 =====  
CPDPRG2 waltz16  
MPC1 3H  
PCPD2 80.50 usec  
PL12 0 dB  
PL13 16.33 dB  
PL14 16.30 dB  
SFO2 300.1315607 MHz  
F2 - Processing parameters  
SI 131012  
SF 75.4677446 MHz  
WDW DM  
SSB 0  
LB 0.30 Hz  
GB 0  
PC 1.40
